1 **Identification of functionally-distinct macrophage**  
2 **subpopulations regulated by efferocytosis in *Drosophila***

---

3

4

5 Jonathon Alexis Coates<sup>1</sup>, Amy Brittle<sup>2</sup>, Emma Louise Armitage<sup>2</sup>, Martin Peter Zeidler<sup>1</sup> & Iwan Robert

6 Evans<sup>2\*</sup>

7

8

9 <sup>1</sup> Department of Biomedical Science and the Bateson Centre, University of Sheffield, Sheffield, S10

10 2TN, UK

11

12 <sup>2</sup> Department of Infection, Immunity and Cardiovascular Disease and the Bateson Centre, University

13 of Sheffield, Sheffield, S10 2TN, UK

14

15 \* Correspondence: [i.r.evans@sheffield.ac.uk](mailto:i.r.evans@sheffield.ac.uk)

16

17 Short title: Macrophage subpopulations regulated by apoptosis in *Drosophila*

## 18 **Abstract**

19 Macrophages are a highly heterogeneous population of cells, with this diversity stemming in part  
20 from the existence of tissue resident populations and an ability to adopt a variety of activation states  
21 in response to stimuli. *Drosophila* blood cells (hemocytes) are dominated by a lineage of cells  
22 considered to be the functional equivalents of mammalian macrophages (plasmatocytes). Until very  
23 recently plasmatocytes were thought to be a homogeneous population. Here, we identify enhancer  
24 elements that label subpopulations of plasmatocytes, which vary in abundance across the lifecycle  
25 of the fly. We demonstrate that these plasmatocyte subpopulations behave in a functionally-distinct  
26 manner when compared to the overall population, including more potent migratory responses to  
27 injury and decreased clearance of apoptotic cells within the developing embryo. Additionally, these  
28 subpopulations display differential localisation and dynamics in pupae and adults, hinting at the  
29 presence of tissue-resident macrophages in the fly. Our enhancer analysis also allows us to identify  
30 novel candidate genes involved in plasmatocyte behaviour in vivo. Misexpression of one such  
31 enhancer-linked gene (*calnexin14D*) in all plasmatocytes improves wound responses, causing the  
32 overall population to behave more like the subpopulation marked by the *calnexin14D*-associated  
33 enhancer. Finally, we show that, we are able to modulate the number of cells within some  
34 subpopulations via exposure to increased levels of apoptotic cell death, thereby decreasing the  
35 number of plasmatocytes within more wound-responsive subpopulations. Taken together our data  
36 demonstrates the existence of macrophage heterogeneity in *Drosophila* and identifies mechanisms  
37 involved in the specification and function of these plasmatocyte subpopulations. Furthermore, this  
38 work identifies key molecular tools with which *Drosophila* can be used as a highly genetically-  
39 tractable, in vivo system to study the biology of macrophage heterogeneity.

40

41

## 42 **Introduction**

43 Macrophages are key innate immune cells responsible for clearing infections, debris and apoptotic  
44 cells, the promotion of wound healing and are necessary for normal development [1]. However,  
45 their aberrant behaviour can also cause or exacerbate numerous human disease states, including  
46 cancer, atherosclerosis and neurodegeneration [1]. Macrophages are a highly heterogeneous  
47 population of cells, which enables them to carry out their wide variety of roles, and this  
48 heterogeneity arises from diverse processes. These processes include the dissemination and  
49 maintenance of tissue resident populations [2] and the ability to adopt a spectrum of different  
50 activation states (termed macrophage polarisation), which can range from pro-inflammatory  
51 (historically termed as M1-like) to anti-inflammatory, pro-healing (M2-like) macrophage activation  
52 states [3,4].

53

54 Macrophage heterogeneity appears to be conserved across jawed vertebrate lineages. Evidence  
55 suggests the existence of pro-inflammatory macrophage populations [5] and myeloid-derived  
56 microglia in zebrafish [6,7], with polarisation also a well-defined phenomenon in other fish species  
57 [8]. Vertebrate macrophages interact with and can become polarised in response to signals  
58 produced by Th1 and Th2 cells, leading to acquisition of M1-like and M2-like activation states,  
59 respectively. To date this form of heterogeneity has been considered to be restricted to organisms  
60 containing both an adaptive and an innate immune system. B and T cell-based adaptive immunity is  
61 thought to have evolved in teleost fish [9] and the diversity of macrophage populations in organisms  
62 possessing only an innate immune system appears more restricted. However, even comparing  
63 mammals as closely related as mice and humans, macrophage markers can be highly divergent [10],  
64 therefore other approaches and markers might be required to identify equivalent macrophage  
65 diversity in lower organisms.

66

67 Macrophage heterogeneity has been extensively studied in mammalian systems and, although this  
68 has provided a good understanding of how macrophages determine their polarisation state, this has  
69 also identified considerable complexity with many activation states possible [11]. Additional  
70 complexity arises with both M1-like and M2-like macrophages found at the same sites of pathology,  
71 for example within atherosclerotic plaques [12]. Furthermore, the cytokine profiles that can be  
72 induced in vitro depend on the exact activation methods used experimentally and these do not  
73 necessarily reflect polarisation states in vivo [13], while other macrophage subpopulations may be  
74 missed by in vitro approaches. Given these intricacies, it is clear that we still need to better  
75 understand the fundamental components and pathways responsible for the specification of different  
76 macrophage subtypes, particularly in vivo. Recently the “macrophage-first” hypothesis has been  
77 proposed, re-emphasising the idea that acute signals polarise macrophages ahead of the  
78 involvement of T cells [8]. Consequently, organisms without a fully-developed adaptive immune  
79 system represent intriguing models in which to examine this idea and better understand  
80 macrophage heterogeneity in vivo.

81

82 *Drosophila melanogaster* has been extensively used to study innate immunity [14], but lacks an  
83 adaptive immune system. Fruit flies possess three types of blood cell (also referred to as  
84 hemocytes): plasmatocytes, crystal cells and lamellocytes. Of these, plasmatocytes are functionally  
85 equivalent to vertebrate macrophages [15,16], with the capacity to phagocytose apoptotic cells and  
86 pathogens, secrete extracellular matrix, disperse during development and migrate to sites of injury  
87 [17]. Although *Drosophila* blood lineages are considerably less complex than their vertebrate  
88 equivalents, they are specified via transcription factors related to those used during vertebrate  
89 myelopoiesis, including GATA and Runx-related proteins [15]. Furthermore, plasmatocytes utilise  
90 evolutionarily-conserved genes in common with vertebrate innate immune cells to migrate (e.g.  
91 SCAR/WAVE, integrins and Rho GTPases [18–22]) and phagocytose (e.g. the CED-1 family member  
92 Draper [23] and CD36-related receptor Croquemort [24]). Given these striking levels of functional

93 and molecular conservation, *Drosophila* has been extensively used for research into macrophage  
94 behaviour in vivo with its genetic tractability and in vivo imaging capabilities facilitating elucidation  
95 of different macrophage behaviours conserved through evolution [16,17]. However, despite these  
96 evolutionarily-conserved commonalities, the plasmatocyte lineage has, until very recently, been  
97 considered a homogeneous cell population. Hints that *Drosophila* plasmatocytes may exhibit  
98 heterogeneity exist in the literature with variation in marker expression observed in larval  
99 hemocytes [25] and non-uniform expression of TGF- $\beta$  homologues upon injury or infection in adults  
100 [26]. Recent single-cell RNA-sequencing (scRNA-seq) experiments performed on larval hemocytes  
101 demonstrated the presence of multiple clusters of cells, which were interpreted as representing  
102 either different stages of differentiation or functional groupings [27,28]. However, the in vivo  
103 identification of subtypes and insights into the roles and specification mechanisms of potential  
104 macrophage subtypes in *Drosophila* has not yet been described.

105

106 Here, we describe the first identification and characterisation of molecularly and functionally-distinct  
107 plasmatocyte subpopulations within *Drosophila melanogaster*. Drawing on a collection of reporter  
108 lines [29], we have identified regulatory elements that define novel plasmatocyte subpopulations in  
109 vivo. We show that these molecularly-distinct subpopulations exhibit functional differences  
110 compared to the overall plasmatocyte population and that the proportions of cells within these  
111 subpopulations can be modulated by external stimuli such as increased levels of apoptosis.  
112 Furthermore, we show that misexpression of a gene associated with a subpopulation-specific  
113 enhancer element is able to modulate plasmatocyte behaviour in vivo, thereby identifying novel  
114 effector genes of plasmatocyte subpopulation function. Together our findings reveal that  
115 macrophage heterogeneity is a fundamental and evolutionarily-conserved characteristic of innate  
116 immunity that pre-dates the development of the adaptive immune system. This significantly extends  
117 the utility of an already powerful genetic model system and provides further avenues to understand  
118 regulation of innate immunity and macrophage heterogeneity.

119

## 120 **Results**

### 121 ***Drosophila* embryonic plasmatocytes do not behave as a uniform population of cells**

122 The macrophage lineage of hemocytes (plasmatocytes) has historically been considered a  
123 homogeneous population of cells. However, careful analysis of plasmatocyte behaviour in vivo  
124 suggested to us that this lineage might not be functionally uniform. For instance, imaging the  
125 inflammatory responses of plasmatocytes to epithelial wounds, we find that some cells close to  
126 injury sites rapidly respond by migrating to the wound, while other neighbouring cells fail to  
127 respond, (Figure 1a; Supplementary Movie 1). We also find that plasmatocytes exhibit variation in  
128 their expression of well-characterised plasmatocyte markers (*crq-GAL4* [19,24]; Figure 1b-b') and  
129 display a broad diversity in their migration speeds within the embryo (random migration at stage 15,  
130 Figure 1c-d). These professional phagocytes also display differences in their capacities to  
131 phagocytose apoptotic cells with some cells engulfing many apoptotic particles, whereas others  
132 engulf very few, if any (Figure 1e). Furthermore, phagocytosis of microorganisms by larval  
133 hemocytes also varies significantly from cell-to-cell in vitro (Figure 1f). These differences within the  
134 plasmatocyte lineage led us to hypothesise that this cell population is more heterogeneous than  
135 previously appreciated.

136

### 137 **Figure 1. Heterogeneity of *Drosophila* embryonic plasmatocyte responses**

138 (a) GFP (green) and nuclear red stinger (magenta) labelled plasmatocytes on the ventral side of a  
139 stage 15 embryo at 0-minutes (a) and 60-minutes post-wounding (a'); plasmatocyte tracks at each  
140 timepoint are overlaid and shown in full in a''. Examples of plasmatocytes that fail to respond to the  
141 wound indicated via asterisks; "w" shows centre of the wound; square bracket in (a) shows  
142 neighbouring plasmatocytes, one of which responds to wounding, the other fails to respond (see  
143 Supplementary Movie 1). (b) imaging of plasmatocytes labelled using *crq-GAL4* to drive expression of

144 GFP reveals a wide range in levels of *crq* promoter activity within plasmatocytes at stage 15; (b')  
145 shows zoom of cells marked by an asterisk in (b). (c) overlay of plasmatocyte tracks of cells shown in  
146 (b) showing significant variation in their random migration speeds. (d) scatterplot of plasmatocyte  
147 random migration (rm) speeds (taken from 23 embryos); line and error bars show mean and  
148 standard deviation, respectively. (e) imaging the ventral middle at stage 15 shows a wide range in  
149 the amount of apoptotic cell clearance (green in merge, labelled via the caspase-sensitive reporter  
150 GC3ai) undertaken by plasmatocytes (magenta in merge, labelled via *srp-3x-mCherry* reporter); (e')  
151 and (e'') show mCherry and GC3ai channels alone; (e''') shows zoomed examples of cells devoid/full  
152 of engulfed GC3ai particles, which are indicated by asterisks in (e). (f) larval hemocytes (green in  
153 merge, labelled via *hml(Δ)-GAL4* driven expression of GFP) exhibit a range in their capacities to  
154 engulf calcofluor-labelled yeast (blue in merge) in vitro; (f') and (f'') show GFP and yeast channels  
155 alone, respectively; white lines indicate cell edges in (f'); asterisks in (f') indicate cells that have  
156 failed to phagocytose yeast; white arrows in (f') indicate cells that have phagocytosed multiple yeast  
157 particles; magenta arrow in (f') indicates zoomed region shown in (f'''). Scale bars represent 20μm  
158 (a-a'', b, c, e-e''), 10μm (e''', f-f''), or 5μm (b', f''). See Supplementary Table 1 for full list of  
159 genotypes.

160

## 161 **Discrete subpopulations of plasmatocytes are present in the developing *Drosophila***

### 162 **embryo**

163 Given the diversity in plasmatocyte behaviour (Figure 1), we hypothesised that macrophage  
164 heterogeneity represents an evolutionarily-conserved feature of innate immunity, which therefore  
165 originally evolved in the absence of an adaptive immune system. To address this and look for  
166 molecular differences between plasmatocytes, we examined transgenic enhancer reporter lines (VT-  
167 *GAL4* lines) produced as part of a recent large-scale tiling array screen [29] that had been annotated  
168 as labelling hemocytes (<http://enhancers.starklab.org/>). Based on examination of the published VT-

169 *GAL4* expression patterns, we identified *VT-GAL4* lines that appeared to label reduced numbers of  
170 plasmatocytes in the embryo, reasoning that plasmatocyte subpopulations could be molecularly  
171 identified on the basis of differences in reporter expression. While a number of the enhancers  
172 appeared to label all plasmatocytes (e.g. *VT41692-GAL4*), we identified several that labelled discrete  
173 numbers of plasmatocytes (Figure 2a). We next confirmed that the cells labelled by these *VT-GAL4*  
174 lines were plasmatocytes by using these constructs to drive expression of *UAS-tdTomato* in the  
175 background of a *GAL4*-independent, pan-hemocyte marker (*srp-GMA* (GFP-tagged actin-binding  
176 domain of moesin); Figure 2b-d; [30]). As initially predicted based on their morphology and position  
177 during embryogenesis, each of the *VT-GAL4* lines marking potential subpopulations did indeed  
178 express in the hemocyte lineage (Figure 2e). These subpopulation cells were identified as  
179 plasmatocytes based upon their morphology, the absence of lamellocytes in embryos and the non-  
180 migratory nature of crystal cells (Figure 2e; [16]) and could be observed to follow both the dorsal  
181 and ventral migration routes [17] used by these cells during their developmental dispersal (Figure  
182 2e). In order to quantify the proportion of cells labelled by each *VT-GAL4* line, we counted the  
183 number of cells labelled on the ventral midline of the developing stage 15 embryo, using *VT-GAL4*  
184 lines to drive GFP expression. This verified reproducible and consistent labelling of discrete subsets  
185 of plasmatocytes (Figure 2f-h), suggesting that these cells represent stable subpopulations within  
186 this macrophage lineage.

187

## 188 **Figure 2. Enhancers labelling plasmatocyte subpopulations in *Drosophila***

189 (a) lateral views of stage 13/14 embryos with in situ hybridisation performed for *GAL4* for indicated  
190 *VT-GAL4* lines (anterior is left). Taken with permission from <http://enhancers.starklab.org/> (n.b.  
191 Stark Lab retain copyright of these images); *VT41692-GAL4* represents an example in which the  
192 majority of plasmatocytes are labelled. (b) schematic diagram showing screening approach to  
193 identify subpopulations of plasmatocytes: *VT-GAL4* positive plasmatocytes will express both GMA  
194 (green) and tdTomato (magenta) – white cells in the schematic. (c-d) images showing the ventral



195 midline at stage 14 of negative control (no driver; *w;UAS-tdTom/+;srp-GMA*) and positive control  
196 (*w;srp-GAL4/UAS-tdTom;srp-GMA*) embryos. (e) images showing embryos containing *VT-GAL4*  
197 labelled cells (via *UAS-tdTomato*, shown in magenta) at stage 13 (first row, ventral views), stage 14  
198 (second row, dorsal views) and stage 15 (third row, ventral views). The entire hemocyte population  
199 is labelled via *srp-GMA* (green); arrows indicate examples of *VT-GAL4* positive plasmatocytes;  
200 asterisks indicate *VT-GAL4* positive cells that are not labelled by *srp-GMA*. N.b. *VT62766-GAL4* image  
201 contrast enhanced to different parameters compared to other images owing to the very bright  
202 labelling of amnioserosal cells (cells on dorsal side of embryo destined to be removed during dorsal  
203 closure; labelled with an asterisk) in the stage 14 image. (f) labelling of smaller numbers of  
204 plasmatocytes on the ventral midline at stage 15 using *VT-GAL4* lines indicated and *UAS-GFP* (green);  
205 boxed regions show zooms of *VT-GAL4* positive plasmatocytes (f'). (g) ventral view of positive  
206 control embryo (*w;srp-GAL4/+;UAS-GFP*) and example plasmatocyte (g') at stage 15. (h) scatterplot  
207 showing quantification of numbers of *VT-GAL4,UAS-GFP* labelled plasmatocytes on the ventral  
208 midline at stage 15; lines and error bars represent mean and standard deviation, respectively. P-  
209 values calculated via one-way ANOVA with a Dunnett's multiple comparison post-test (all compared  
210 to *srp-GAL4* control; n=9 embryos per genotype. All scale bars represent 10µm. See Supplementary  
211 Table 1 for full list of genotypes.

212

### 213 **Subpopulations of *Drosophila* plasmatocytes vary across development: subpopulation** 214 **dynamics in larvae and white pre-pupae**

215 Having identified subpopulations of plasmatocytes in the embryo, we then tested other stages of the  
216 life cycle to see how expression might be maintained or modulated throughout development. In  
217 order to exclude potential expression in non-hemocyte cells (e.g. non-plasmatocyte cells apparent in  
218 Figure 2e), we labelled subpopulation cells specifically using a split GAL4 approach [31], via which  
219 only cells expressing both *serpent* (a well-characterised hemocyte marker; [32]) and the named VT

220 enhancer would be labelled via transcriptional activation of *UAS* transgenes (Supplementary Figure  
221 1).

222

223 Imaging of L3 larvae containing split GAL4 constructs (*srp-AD;VT-DBD* – henceforth abbreviated to  
224 *VTn*) driving *UAS-stinger* revealed that very few subpopulation cells were present at this stage  
225 (Figure 3a-f). From larval development onwards, we cannot use cell morphology to discriminate  
226 between plasmatocytes and other hemocyte lineages (crystal cells and lamellocytes) and therefore  
227 refer to subpopulation cells as hemocytes for these subsequent stages. Using this approach,  
228 *VT32897* and *VT17559* labelled the most cells (Figure 3c-d), with only the occasional cell present in  
229 *VT57089* larvae (Figure 3e) and cells essentially absent from *VT62766* larvae (Figure 3f). Labelled  
230 cells were also present in the head region, along the dorsal vessel (the fly heart) and between the  
231 salivary glands (which exhibit non-specific labelling) in *VT32897* larvae. The *VT32897* head region  
232 cells are potentially specifically localised hemocytes, whereas cells at the remaining two sites are  
233 likely to correspond to *serpent*-positive nephrocytes and garland cells [33,34], respectively (Figure  
234 3d). *VT57089* shows additional staining in the head region (potentially the Bolwig organ; Figure 3e)  
235 and, as per the dorsal vessel-associated cells in *VT32897* (Figure 3d), this can be observed in positive  
236 controls (data not shown). These patterns closely resemble patterns observed using the initial *VT*-  
237 *GAL4* reporters, albeit with more restricted labelling due to our split GAL4 approach (data not  
238 shown).

239

### 240 **Figure 3. Plasmatocyte subpopulations in larvae and white pre-pupae**

241 (a-f) dorsal and ventral views of L3 larvae lacking *GAL4* (a, negative control), with hemocytes labelled  
242 (b, positive control with *UAS-stinger* driven by *srp-AD;srp-DBD*), or with cells labelled through  
243 expression of *UAS-stinger* via *srp-AD* and the *VT-DBD* transgenes indicated (c-f); non-specific  
244 expression of *Stinger* in salivary glands and gut autofluorescence is visible in (a') and (c'-f') and is  
245 indicated by an arrow and asterisk, respectively, in (a'). Arrows/asterisks indicate regions containing

246 circulating hemocytes (c), potential hemocyte population in the head region (d), possible  
247 proventricular region/garland cells (d'), cells in the Bolwig organ (arrow in e), and rare circulating  
248 hemocytes labelled via *srp-AD;VT57089-DBD* (asterisk in e) that are shown as zooms in inset images.  
249 (f') shows region indicated by bar in (f) at a reduced brightness to reveal detail of cells along the  
250 dorsal vessel. (g-h) dorsal and ventral views of negative control (g, *UAS-stinger* but no driver) and  
251 positive control (h, *UAS-stinger* driven by *srp-AD;srp-DBD*) white pre-pupae (WPP). (i-l) VT enhancer-  
252 labelled cells are almost completely absent from WPP (*srp-AD;VT-DBD* transgenes used to drive *UAS-*  
253 *stinger* expression). All scale bars represent 500 $\mu$ m; images contrast enhanced to 0.3% saturation.  
254 See Supplementary Table 1 for full list of genotypes.  
255  
256 Imaging of white pre-pupae (WPP), the stage that marks the beginning of pupal development and  
257 metamorphosis, showed very similar patterns across the split GAL4 VT enhancer lines (Figure 3g-l),  
258 but with a further reduction in the numbers of cells labelled. It was possible to observe the  
259 occasional cell moving in circulation within WPP, strongly suggesting these cells are hemocytes  
260 (Supplementary Movies 2 and 3). Live imaging of *VT32897* WPP also confirmed association of cells  
261 with the pumping dorsal vessel (Supplementary Movie 4). Significantly, this data indicates that the  
262 presence of subpopulations within embryos is not simply a consequence of slow accumulation of  
263 fluorescent proteins by weak drivers, since these enhancer-based reporters do not label an ever-  
264 increasing number of cells as development proceeds. Overall, the numbers of hemocytes within  
265 subpopulations decreases over larval and early pupal stages demonstrating that plasmatocyte  
266 subpopulations are developmentally regulated. Such changes could reflect specific and changing  
267 requirements for specialised plasmatocyte subpopulations across the life cycle, for example an  
268 association with processes required for organogenesis [35–37]. This specific localisation of  
269 subpopulation cells also indicates the potential for tissue-resident macrophages in *Drosophila*.  
270

## 271 **Subpopulation cells return in large numbers during pupal development**

272 Since subpopulation cells appear associated with stages of development when organogenesis and  
273 tissue remodelling occurs, we hypothesised that hemocyte subpopulations would return during  
274 metamorphosis. Imaging pupae at various times after puparium formation (APF) revealed that  
275 subpopulation cells re-emerged in large numbers during this stage, but with distinct dynamics  
276 (Figure 4a-f): *VT17559* cells have already returned in very substantial numbers by 18h APF (Figure  
277 4c), whereas *VT32897* reporter expression reappeared between 24 and 48h APF (Figure 4d).  
278 *VT57089* and *VT62766*-labelled cells increased in numbers more gradually over the course of pupal  
279 development (Figure 4e-f).

280

## 281 **Figure 4. Plasmatocyte subpopulations return with distinct dynamics during pupal**

### 282 **development**

283 (a-b) dorsal images of negative control (lacking *GAL4* drivers, a) and positive control pupae (labelled  
284 via *srp-AD;srp-DBD*, b) at 18h after puparium formation (APF). (c-f) dorsal images showing  
285 localisation of cells labelled using *srp-AD* and *VT-DBD* (VT enhancers used to drive *DBD* expression  
286 indicated above panels) to drive expression of *UAS-stinger* during pupal development from 18h APF  
287 to 72h APF (c-f). All image panels contrast enhanced to 0.3% saturation to reveal localisation of  
288 labelled cells due to differing intensities of reporter line expression. Scale bars represent 500µm. See  
289 Supplementary Table 1 for full list of genotypes.

290

## 291 **Subpopulations display distinct dynamics and localisation in adults**

292 Immediately after adults hatch, large numbers of split *GAL4*-labelled cells can be observed across all  
293 lines and are present in selective regions that overlap with the overall adult hemocyte population  
294 (Figure 5a-e). The overall hemocyte population remains detectable as adults age (0-6 weeks; Figure  
295 5a), however not all subpopulations exhibit an identical localisation or dynamics during this time

296 (Figure 5b-e). *VT57089* and *VT62766* cells largely disappear by 1 week (Figure 5d-e) and the majority  
297 of *VT17559*-labelled cells are absent by 2 weeks (Figure 5b). By contrast, *VT32897* cells persist for at  
298 least 6 weeks of adult life and are particularly prominent in the thorax at 4 weeks (Figure 5c). Other  
299 differences in localisation are also apparent with cells particularly obvious in the legs for the  
300 *VT17559* line (Figure 5b, day 1-2 weeks), whereas *VT57089* and *VT62766*-labelled cells are more  
301 closely associated with the thorax and dorsal abdomen (Figure 5d-e, day 1). Labelled cells are also  
302 present in the proboscis for several lines (Figure 5c-e). The distinct dynamics of subpopulation cells  
303 strongly suggests these subpopulations are at least partially distinct from each other and highlights  
304 their plasticity during development, with their presence, return and disappearance correlating with  
305 changes in the biology of blood cells over the entire lifecourse.

306

### 307 **Figure 5. Plasmacyte subpopulations exhibit distinct localisation and dynamics as adults**

#### 308 **age**

309 (a-e) representative lateral images of adult flies between 0 and 6 weeks of age showing localisation  
310 of cells labelled using *srp-3x-mCherry* (positive control, a), or split GAL4 to drive expression of stinger  
311 (*srp-AD;VT-DBD*, b-e). The VT enhancers used to drive expression of the DNA binding domain (*DBD*)  
312 of *GAL4* correspond to *VT17559* (b), *VT32897* (c), *VT57089* (d) and *VT62766* (e); inset images show  
313 proboscis region at a reduced level of brightness to reveal cellular detail (d). Images contrast  
314 enhanced to 0.15% saturation (a-c, e) or 0.75% (d) to reveal localisation of labelled cells due to  
315 differing intensities of reporter line expression. Scale bars represent 500 $\mu$ m. At least 5 flies were  
316 imaged for each timepoint. See Supplementary Table 1 for full list of genotypes.

317

318 **Subpopulation cells behave in a functionally-distinct manner compared to the overall**  
319 **plasmatocyte population**

320 Given that the VT lines identified above are specifically and dynamically expressed in subpopulations  
321 of hemocytes during *Drosophila* development, we next set out to investigate whether the labelled  
322 subpopulations are also functionally distinct using a range of immune-relevant assays. The ability of  
323 vertebrate macrophages to respond to pro-inflammatory stimuli, such as injuries, can vary according  
324 to their activation status [38,39]. To investigate this in our system, a well-established assay of  
325 inflammatory migration [19] was employed (Figure 1a; Supplementary Movie 1). Strikingly, following  
326 laser-induced wounding, cells labelled by three *VT-GAL4* lines (*VT17559-GAL4*, *VT32897-GAL4* and  
327 *VT62766-GAL4*) showed a significantly more potent migratory response to injury. In each case a  
328 greater proportion of labelled subpopulation cells migrated to wounds, compared to the overall  
329 hemocyte population as labelled by a pan-plasmatocyte driver (Figure 6a-c). Consistent with our  
330 results above, plasmatocytes labelled by the VT lines represent a subset of the total number of  
331 hemocytes present ventrally in stage 15 embryos (Figure 6d).

332

333 **Figure 6. *Drosophila* plasmatocyte subpopulations demonstrate functional differences**  
334 **compared to the overall plasmatocyte population**

335 (a-b) example images showing plasmatocyte wound responses at 60-minutes post-wounding  
336 (maximum projection of 15 $\mu$ m deep region). Cells labelled via *UAS-stinger* using *srp-GAL4* (a) and  
337 *VT17559-GAL4* (b); dotted lines show wound edges. (c-d) scatterplots showing percentage of *srp-*  
338 *GAL4* (control) or *VT-GAL4* labelled plasmatocytes responding to wounds at 60 minutes (c) or total  
339 numbers of labelled plasmatocytes in wounded region (d); p=0.018, 0.041, 0.99, 0.0075 compared to  
340 *srp-GAL4* (n=77, 21, 22, 26, 25) (c); p<0.0001 compared to *srp-GAL4* for all lines (n=139, 35, 37, 30,  
341 44) (d). (e-f) example tracks of plasmatocytes labelled with GFP via *srp-GAL4* (e) and *VT17559-GAL4*  
342 (f) during random migration on the ventral side of the embryo for 1 hour at stage 15. (g-h)  
343 scatterplots showing speed per plasmatocyte, per embryo (g) and directionality (h) at stage 15 in

344 embryos containing cells labelled via *srp-GAL4* (control) or the *VT-GAL4* lines indicated;  $p=0.0097$ ,  
345  $0.999$ ,  $0.82$ ,  $0.226$  compared to *srp-GAL4* ( $n=21, 19, 17, 21, 20$ ) (g);  $p=0.998, 0.216, 0.480, 0.999$   
346 compared to *srp-GAL4* ( $n=21, 19, 17, 21, 20$ ) (h). (i-j) example images of cells on the ventral midline  
347 at stage 15 with labelling via *UAS-stinger* expression using *srp-GAL4* (i) and *VT17559-GAL4* (j);  
348 zoomed plasmatocytes (i', j') indicated by white boxes in main panels; arrows show vacuoles, "n"  
349 marks nucleus; n.b. panels contrast enhanced independently to show plasmatocyte morphology. (k)  
350 scatterplots showing vacuoles per plasmatocyte, per embryo at stage 15 (measure of  
351 efferocytosis/apoptotic cell clearance); cells labelled via *srp-GAL4* (control) or the *VT-GAL4* lines  
352 indicated;  $p=0.0020, 0.99, 0.0040, 0.0002$  compared to *srp-GAL4* ( $n=76, 10, 12, 29, 31$ ). Lines and  
353 error bars represent mean and standard deviation, respectively (all scatterplots); one-way ANOVA  
354 with a Dunnett's multiple comparison test used to compare *VT-GAL4* lines with *srp-GAL4* control in  
355 all datasets; ns, \*, \*\* and \*\*\*\* denote  $p>0.05$ ,  $p<0.05$ ,  $p<0.01$  and  $p<0.0001$ , respectively. All scale  
356 bars represent  $20\mu\text{m}$ . See Supplementary Table 1 for full list of genotypes.

357

358 We next investigated in vivo migration speeds of the embryonic plasmatocyte subpopulations (as  
359 per Figure 1c-d). Stage 15 embryos were imaged for 1 hour and individual plasmatocyte movements  
360 were tracked (Figure 6e-f). Only the *VT17559-GAL4* labelled plasmatocyte subpopulation displayed  
361 statistically significantly faster rates of migration compared to the overall plasmatocyte population  
362 (labelled using *srp-Gal4*; Figure 6g). There were no differences in directionality (cell displacement  
363 divided by total path length) for any of the subpopulations, suggesting that the mode of migration  
364 was similar across these lines and with that of the overall population (Figure 6h).

365

366 Apoptotic cell clearance (efferocytosis) represents another evolutionarily-conserved function  
367 performed by embryonic plasmatocytes (Figure 1e; [40]). Therefore, we investigated this function in  
368 subpopulations, using numbers of vacuoles per cell as a proxy for this process [18]. Cells labelled via  
369 *VT17559-GAL4*, *VT57089-GAL4* and *VT62766-GAL4* (but not *VT32897-GAL4*) contained fewer

370 vacuoles than the overall plasmatocyte population (Figure 6i-k), suggesting that these discrete  
371 populations of cells are less effective at removing apoptotic cells inside the developing embryo.

372

373 Finally, we examined cell size and shape of labelled plasmatocyte subpopulations. Vertebrate  
374 macrophages are highly heterogeneous, with distinct morphologies dependent upon their tissue of  
375 residence or polarisation status [41–43]. We found no obvious size or shape differences between *VT-*  
376 *GAL4* labelled cells and the overall plasmatocyte population (Supplementary Figure 2a-e). This was  
377 also the case when *VT-GAL4* positive cells were compared to internal controls (*VT-GAL4* negative  
378 cells within the same embryos) for a range of shape descriptors (Supplementary Figure 2f-i).

379 Similarly, we were unable to detect differences in ROS levels or the proportion of *VT-GAL4* labelled  
380 plasmatocytes that phagocytosed pHrodo-labelled *E. coli* compared to controls (Supplementary  
381 Figures 3 and 4), two processes associated with pro-inflammatory activation of macrophages [44].

382

383 Taken together these data show that the subpopulations of plasmatocytes identified via the *VT-*  
384 *GAL4* reporters exhibit functional differences compared to the overall plasmatocyte population  
385 (Table 1). Therefore, as well as displaying molecular differences in the form of differential enhancer  
386 activity, and hence reporter expression, these discrete populations of cells behave differently. This  
387 strongly suggests that these cells represent functionally-distinct subpopulations and that the  
388 plasmatocyte lineage is not homogeneous. Furthermore, not all subpopulations displayed identical  
389 functional characteristics, suggesting that there are multiple distinct subtypes present in vivo,  
390 although some overlap between subpopulations seems likely. For example, *VT17559-GAL4* labelled  
391 cells were more effective at responding to wounds and migrated more rapidly, but carried out less  
392 phagocytosis of apoptotic cells. By contrast, *VT32987-GAL4* labelled cells only displayed improved  
393 wound responses (Figure 6).

394



395 **Table 1. Summary of plasmatocyte subpopulation characteristics and their developmental**  
396 **regulation**

397

398 **VT enhancers identify functionally active genes within plasmatocytes**

399 In the original study that generated the *VT-GAL4* collection, the majority of active enhancer  
400 fragments tested were found to control transcription of neighbouring genes [29]. Thus, genes  
401 proximal to enhancers that label plasmatocyte subpopulations represent candidate regulators of  
402 immune cell function (Table 2; Figure 7a). *VT62766-GAL4* labels a subpopulation of plasmatocytes  
403 with enhanced migratory responses to injury (Figure 6) and this enhancer region is found within the  
404 genomic interval containing *paralytic (para)*, which encodes a subunit of a voltage-gated sodium  
405 channel [45], and upstream of the 3' end of *calnexin14D (cnx14D)* (Figure 7a). *cnx14D* encodes a  
406 calcium-binding chaperone protein resident in the endoplasmic reticulum [46]. Alterations in calcium  
407 dynamics are associated with clearance of apoptotic cells [47,48] and modulating calcium signalling  
408 within plasmatocytes alters their ability to respond to wounds [49]. Therefore, given the association  
409 of *cnx14D* with the *VT62766* enhancer and the potential for plasmatocyte behaviours to be  
410 modulated by altered calcium dynamics, we examined whether misexpressing *cnx14D* in all  
411 plasmatocytes was sufficient to cause these cells to behave more similarly to the *VT62766*  
412 subpopulation. Critically, pan-hemocyte expression of *cnx14D* stimulated wound responses with  
413 elevated numbers of plasmatocytes responding to injury compared to controls (Figure 7b-c),  
414 consistent with the enhanced wound responses of the endogenous *VT62766-GAL4* positive  
415 plasmatocyte subpopulation (Figure 6c). This reveals that genes proximal to subpopulation-defining  
416 enhancers represent candidate genes in dictating the biology of cells in those subpopulations. More  
417 importantly, misexpression of a subpopulation-linked gene promotes a similar behaviour to that  
418 subpopulation in the wider plasmatocyte population.

419

420 **Table 2. VT enhancer region location and neighbouring genes**

421

422 **Figure 7. Misexpression of *cnx14D* improves plasmatocyte inflammatory responses to**  
423 **injury**

424 (a) chromosomal location of the *VT62766-GAL4* enhancer region. Only one transcript is shown for  
425 *para*, which possesses multiple splice variants. The *VT62766* region is highlighted in yellow and by an  
426 asterisk; *cnx14D* (indicated by magenta arrow) lies within *para*. (b) scatterplot showing numbers of  
427 plasmatocytes present at stage 15 on the ventral side of the embryo ahead of wounding in controls  
428 and on misexpression of *cnx14D* in all hemocytes using both *srp-GAL4* and *crq-GAL4* (*hc>cnx14D*);  
429  $n=30$  and  $38$  for control and *hc>cnx14D* embryos, respectively,  $p=0.670$  via Student's t-test. (c)  
430 scatterplot of wound responses 60-minutes post-wounding (number of plasmatocytes at wound,  
431 normalised for wound area and to control responses);  $n=21$  and  $30$  for control and *hc>cnx14D*  
432 embryos, respectively;  $p=0.0328$  via Student's t-test. Line and error bars represent mean and  
433 standard deviation, respectively (b-c). See Supplementary Table 1 for full list of genotypes.

434

435 **Plasmatocyte subpopulations can be modulated via exposure to enhanced levels of**  
436 **apoptosis**

437 Having defined functional differences in embryonic plasmatocyte subpopulations and characterised  
438 how these populations shift during development and ageing, we sought to identify the processes via  
439 which these subpopulations were specified. In vertebrates, a range of stimuli drive macrophage  
440 heterogeneity and polarisation [3,4], with apoptotic cells able to polarise macrophages towards anti-  
441 inflammatory phenotypes [50,51]. In the developing fly embryo, high apoptotic cell burdens impair  
442 wound responses [52,53], consistent with reprogramming of plasmatocytes towards less wound-  
443 responsive states. In order to test whether apoptotic cells might regulate plasmatocyte  
444 subpopulations, we exposed plasmatocytes to increased levels of apoptosis in vivo. In the

445 developing fly embryo, both glial cells and plasmatocytes contribute to the clearance of apoptotic  
446 cells. We, and others, have previously shown that loss of *repo*, a transcription factor required for  
447 glial specification [54–56], leads to decreased apoptotic cell clearance by glia [57], and a subsequent  
448 challenge of plasmatocytes with increased levels of developmental apoptosis (Figure 8a-b; [53]).  
449 Therefore, a *repo* mutant background represents an established model with which to stimulate  
450 plasmatocytes with enhanced levels of apoptosis.

451

452 **Figure 8. *Drosophila* plasmatocyte subpopulation identity can be controlled through**  
453 **exposure to apoptotic cells**

454 (a-b) maximum projections showing apoptotic cells (via anti-cDCP-1 staining, magenta in merge) and  
455 plasmatocytes (via anti-GFP staining, green in merge) at stage 15 on the ventral midline in control  
456 and *repo* mutant embryos. (c-g) maximum projections of the ventral midline showing a negative  
457 control embryo (c) and embryos containing *VT-GAL4* labelled plasmatocytes at stage 15 in control (d-  
458 g) and *repo* mutant embryos (d' -g'). *VT-GAL4* used to drive *UAS-stinger* expression (green) and *srp-*  
459 *H2A-3x-mCherry* used to label plasmatocytes (magenta). Arrows and asterisks indicate examples of  
460 *VT-GAL4* positive plasmatocytes and non-plasmatocyte cells, respectively; note loss of non-  
461 plasmatocyte *VT-GAL4* expression in *repo* mutants versus controls for *VT62766-GAL4*. (h) scatterplot  
462 showing percentage of H2A-3x-mCherry positive cells that are also positive for *VT-GAL4* driven  
463 Stinger expression in control and *repo* mutant embryos at stage 15. Student's t-test used to show  
464 significant difference between controls and *repo* mutants ( $p=0.0009$ ,  $n=22$ , 15 for *VT17559-GAL4*  
465 lines;  $p=0.0017$ ,  $n=37$ , 28 for *VT32897-GAL4* lines;  $p=0.0005$ ,  $n=25$ , 14 for *VT57089-GAL4* lines;  
466  $p<0.0001$ ,  $n=22$ , 20 for *VT62766-GAL4* lines). Scale bars represent 10 $\mu$ m (a-g); lines and error bars  
467 represent mean and standard deviation (h); \*\*, \*\*\* and \*\*\*\* denote  $p<0.01$ ,  $p<0.001$  and  $p<0.0001$ ,  
468 respectively. See Supplementary Table 1 for full list of genotypes.

469

470 Using *srp-H2A-mCherry* to mark all plasmatocytes within the embryo (Figure 8c), we quantified the  
471 proportion of plasmatocytes labelled via *VT-GAL4* transgenes in *repo* mutants compared to controls  
472 (Figure 8d-h). Increased exposure to apoptotic death shifted plasmatocytes out of each  
473 subpopulation (Figure 8d-h). Subpopulations exhibited differing sensitivities to contact to apoptotic  
474 cells, with *VT62766-GAL4* labelled cells undergoing the largest decrease in labelled cells in a *repo*  
475 mutant background (Figure 8h). These results therefore reveal a mechanism via which the  
476 molecularly and functionally-distinct subpopulations of plasmatocytes we have identified can be  
477 manipulated using an evolutionarily-conserved, physiological stimulus (apoptotic cells) relevant to  
478 immune cell programming.

479

## 480 Discussion

481 We have identified molecularly and functionally-distinct subpopulations of *Drosophila* macrophages  
482 (plasmatocytes). These subpopulations showed functional differences compared to the overall  
483 plasmatocyte population, exhibiting enhanced responses to injury, faster migration rates and  
484 reduced rates of apoptotic cell clearance within the developing embryo. These subpopulations are  
485 highly plastic with their numbers varying across development, in line with the changing behaviours  
486 of *Drosophila* blood cells across the lifecycle. That these discrete populations of plasmatocytes  
487 represent bona fide subpopulations is evidenced by the finding that numbers of cells within  
488 subpopulations can be manipulated via exposure to enhanced levels of apoptotic cell death *in vivo*.  
489 Furthermore, pan-hemocyte expression of a gene (*cnx14D*) linked to one of the enhancers used to  
490 visualise these subpopulations (*VT62766-GAL4*) shifts the behaviour of these cells towards a more  
491 wound-responsive state, resembling the behaviour of *VT62766-GAL4* labelled cells. Taken together  
492 this data strongly suggests that *Drosophila* blood cell lineages are more complex than previously  
493 known.

494

495 Vertebrate macrophage lineages show considerable heterogeneity due to the presence of circulating  
496 monocytes, a wide variety of tissue resident macrophages and a spectrum of activation states that  
497 can be achieved. Whether more simple organisms such as *Drosophila* exhibit heterogeneity within  
498 their macrophage-like lineages has been a topic of much discussion and hints in the literature  
499 suggest this as a possibility. The ease of extracting larval hemocytes has meant these cells have  
500 received more attention than their embryonic counterparts. Braun and colleagues identified  
501 heterogeneity in reporter expression within plasmatocytes in an enhancer trap screen, but without  
502 associating these with functional differences [58]. Non-uniform expression has also been reported  
503 for plasmatocyte genes such as *hemolectin* [59], *hemese*, *nimrod* [60,61], *croquemort* [26], TGF- $\beta$   
504 family members [26] and the iron transporter *malvolio* [62], though some of these differences are  
505 likely due to incomplete differentiation from a pro-hemocyte state [25]. Recent transcriptional  
506 profiling approaches via scRNA-seq have suggested the existence of distinct larval blood cell  
507 populations in *Drosophila* [27,28]. One study interpreted this data as reflecting different  
508 progenitor/differentiation states [27]; another identified a number of potentially different functional  
509 groups, including more activated cell populations displaying expression signatures reflective of active  
510 Toll and JNK signalling [28]. Our identification of developmentally-regulated subpopulations, coupled  
511 with this recent evidence from larvae, points to heterogeneity within the plasmatocyte lineage.

512

513 The subpopulations we have identified are almost entirely absent from L3 larvae (the stage used in  
514 the aforementioned scRNA-seq studies) and presumably represent additional heterogeneity specific  
515 to other developmental stages. It is clear that the biology of *Drosophila* blood cells varies  
516 significantly across the lifecycle: for instance plasmatocytes play strikingly different functional roles  
517 in embryos and larvae [35,36], shifting from developmental roles to host defence. Additionally,  
518 modes of migration to sites of injury are similar in embryos and pupae (directional migration  
519 [19,63]), but larval cells are captured from circulation via adhesion [64]. These functional differences  
520 are reflected in molecular differences between embryonic and larval blood cells revealed via bulk

521 RNA-seq [28], with reprogramming within larvae potentially explaining why our VT enhancer-  
522 labelled subpopulations are absent at that stage. Transcriptional changes are also associated with  
523 steroid hormone-mediated signalling in pupae [37], which may drive re-emergence of  
524 subpopulations in time for metamorphosis.

525

526 In higher vertebrates, erythro-myeloid precursor/progenitor cells seed the developing embryo to  
527 give rise to tissue resident macrophage populations [65–67]. Intriguingly, the localisation of  
528 subpopulations in adult flies shows some biases between subpopulation lines and the overall  
529 population, hinting at the potential for some degree of tissue residency in *Drosophila*. Hemocytes  
530 localise to and/or play specialised roles at a range of tissues including the respiratory epithelia [68],  
531 dorsal vessel [69], ovaries [70], wings [71], gut [72] and proventriculus [73]. It is therefore tempting  
532 to speculate that particular subpopulations could be recruited or differentiate in situ in order to  
533 carry out specific functions.

534

535 Macrophage diversity enables these important innate immune cells to operate in a variety of niches  
536 and carry out a wide variety of functions in vertebrates. Our data demonstrate that not all  
537 macrophages are equivalent within the developing *Drosophila* embryo, although the enhancers we  
538 have used to identify plasmacyte subpopulations do not correspond to markers used in defining  
539 macrophage polarisation or tissue resident populations in an obvious way. Therefore how the  
540 subpopulations we have uncovered map onto existing vertebrate paradigms remains an open  
541 question. Nonetheless, the subpopulations we have identified could be viewed as displaying a pro-  
542 inflammatory skewing of immune cell behaviours, given their enhanced wound responses, faster  
543 rates of migration and decreased efferocytic capacity. Pro-inflammatory macrophages (M1-like) in  
544 vertebrates are associated with clearance of pathogens, release of pro-inflammatory cytokines and,  
545 most pertinently, initial responses to injury [44]. In contrast, anti-inflammatory macrophages (M2-

546 like) are more allied with tissue development and repair [74] and can display enhanced rates of  
547 efferocytosis [75–77].

548

549 Apoptotic cell clearance can promote anti-inflammatory states in vertebrates [78]. Consequently, it  
550 is both consistent and compelling that exposure of *Drosophila* plasmatocytes to excessive levels of  
551 apoptotic cells dampens their inflammatory responses to injury and rates of migration in the  
552 developing embryo [18,52,53] and also shifts cells out of the more wound-responsive and potentially  
553 pro-inflammatory subpopulations we have discovered. Other precedents may be apparent in flies  
554 with shifts towards aerobic glycolysis occurring during infection [79], similar to those observed in  
555 vertebrate polarisation to pro-inflammatory states [80]. Furthermore, TGF- $\beta$  signalling is associated  
556 with promotion of anti-inflammatory characteristics in vertebrates during resolution of inflammation  
557 [78] and these molecules can be found in discrete sets of hemocytes on injury and infection in adult  
558 flies [26]. Thus, despite significant evolutionary distance between flies and vertebrates, comparable  
559 processes and mechanisms may control the behaviours of their innate immune cells.

560

561 We have concentrated on using the VT enhancers as reporters to follow subpopulation behaviour in  
562 vivo, however these elements also potentially identify genes required for specific functions  
563 associated with each subpopulation. For instance, the *VT17559* enhancer overlaps *Lisencephaly-1*,  
564 which has been shown to be expressed in hemocytes [81]. Furthermore, misexpression of *cnx14D*,  
565 located proximally to the *VT62766* enhancer, was sufficient to improve overall wound responses,  
566 paralleling the behaviour of the *VT62766-GAL4* labelled subpopulation. Cnx14D can bind calcium and  
567 therefore potentially modulates calcium signalling within plasmatocytes. Calcium signalling is known  
568 to influence wound responses in flies [49] and plays a central role during phagocytosis of apoptotic  
569 cells [47,48]. Therefore a molecule such as Cnx14D, which also has a known role in phagocytosis in  
570 *Dictyostelium* [82], could help fine-tune the behaviour of specific macrophage subpopulations. When  
571 considered in combination with the ability to manipulate the numbers of cells within subpopulations

572 with physiologically relevant stimuli, the functional linkage of candidate genes with subpopulation  
573 behaviours strongly suggests that we have identified bona fide functionally and molecularly-distinct  
574 macrophage subpopulations in the fly.

575

576 In conclusion, we have demonstrated that *Drosophila* macrophages are a heterogeneous population  
577 of cells with distinct functional capabilities. We have characterised novel tools in which to visualise  
578 these subpopulations and have used these tools to reveal functional differences between these  
579 subpopulations and the general complement of hemocytes. Furthermore, we have shown that these  
580 subpopulations can be manipulated by exposure to apoptotic cells and can be linked to specific  
581 functional players. Therefore, we have further established *Drosophila* as a model for studying  
582 macrophage heterogeneity and immune programming and demonstrate that macrophage  
583 heterogeneity is a key feature of the innate immune system even in the absence of adaptive  
584 immunity and is conserved more widely across evolution than previously anticipated.

585

## 586 **Methods**

### 587 **Fly genetics and reagents**

588 Standard cornmeal/agar/molasses media was used to culture *Drosophila* at 25°C (see Supplementary  
589 Table 2 for ingredients). *srp-GAL4* [83], *crq-GAL4* [19], *da-GAL4* [84] and the *GAL4*-independent lines  
590 *srp-GMA* [30], *srp-3x-mCherry* and *srp-H2A-3xmCherry* [85] were used to label the entire hemocyte  
591 population during embryonic development or in adults. *Hml(Δ)-GAL4* was used to label larval  
592 hemocytes [86]. *srp-GAL4*, *Hml(Δ)-GAL4*, *VT-GAL4* lines (obtained from the VDRC, Vienna; [29]) and  
593 split *GAL4* lines (see below) were used to drive expression from *UAS-tdTomato* (Bloomington stock  
594 36327), *UAS-GFP*, *UAS-red stinger*, *UAS-stinger*, *UAS-cnx14D* (Harvard stock d04188) or *UAS-GC3ai*  
595 [87]. Experiments were conducted in a *w*<sup>1118</sup> background and the *repo*<sup>03702</sup> null allele was used to  
596 expose plasmatocytes to enhanced levels of apoptotic cell death in the embryo [53,54,56]. Both



597 *UAS-tdTomato* and *UAS-GFP* were used to analyse subpopulations in the developing embryo in order  
598 to ensure labeling of discrete numbers of plasmatocytes was not due to positional effects of  
599 insertion sites that led to mosaic expression (Figure 2). See Supplementary Table 1 for a full list of  
600 *Drosophila* genotypes, transgenes and the sources of the *Drosophila* lines used in this study.  
601  
602 Flies were added to laying cages attached to apple juice agar plates supplemented with yeast paste  
603 and allowed to acclimatise for 2 days before embryo collection. Plates were then changed every  
604 evening and cages incubated at 22°C overnight before embryos were collected the following  
605 morning. Embryos were collected by washing the plates with distilled water and gently disturbing  
606 the embryos with a paintbrush, after which embryos were collected into a cell strainer. Embryos  
607 were dechorionated in undiluted bleach for 1-2 minutes and then washed in distilled water until free  
608 from bleach. The fluorescent balancers *CTG*, *CyO dfd*, *TTG* and *TM6b dfd* [88,89] were used to  
609 discriminate homozygous embryos after removal of the chorion.

610

### 611 **Generation of split GAL4 transgenic lines**

612 We used the split GAL4 system [31] to restrict VT enhancer expression to *serpent*-positive cells. The  
613 activation domain (AD) of *GAL4* was expressed using a well-characterised fragment of the hemocyte-  
614 specific *serpent* promoter [83,85] and the DNA-binding domain (DBD) was expressed under the  
615 control of VT enhancer regions corresponding to *VT17559-GAL4*, *VT32897-GAL4*, *VT57089-GAL4* or  
616 *VT62766-GAL4*. High-fidelity polymerase (KAPA HiFi Hotstart ReadyMix, Roche) was used to PCR  
617 amplify VT enhancer regions from *w*<sup>1118</sup> genomic DNA, which were then TA cloned into the  
618 pCR8/GW/TOPO vector. Primers were designed according to VT enhancer sequences available via  
619 the Stark Lab Fly Enhancers website (<http://enhancers.starklab.org/>; [29]). To make *VT-DBD*  
620 transgenic constructs, VT enhancers were transferred from *pCR8/GW/TOPO* into *pBPZpGal4DBDUw*  
621 (Addgene clone 26233) using LR clonase technology (Invitrogen Gateway LR Clonase II Enzyme Mix -  
622 Catalog Number 11791-020).

623

624 To express the *DBD* and *AD* of *GAL4* under the control of the *serpent* promoter (*srp-AD* and *srp-*  
625 *DBD*), these were subcloned into an attB containing vector containing this promoter  
626 (*pBS\_MCS\_SRPW\_attB*; DSPL337 – a gift from Daria Siekhaus, IST, Austria; [85]). *DBD* and *AD*  
627 sequences along with the *Drosophila* synthetic minimal core promoter (DSCP) region were amplified  
628 using PCR from vectors *pBPZpGal4DBDUw* and *pBpp65ADZpUw* (Addgene clone 26234) using  
629 primers that added NotI and AvrII restriction sites  
630 (CTGATCGCGGCCGCAAAGTGGTGATAAACGGCCGGC and  
631 GATCAGCCTAGGGTGGATCTAAACGAGTTTTTAAGCAAACCTCAC). These were subcloned into DSPL337  
632 cut with NotI/AvrII (New England Biolabs) using T4 DNA ligase (Promega). Transgenic flies were  
633 generated by site-specific insertion of transgenic constructs into the VK1 attP site on chromosome 2  
634 and/or attP2 on chromosome 3 by Genetivision (Texas, USA).

635

### 636 **Imaging of *Drosophila* embryos, larvae, pupae and adults**

637 Live embryos were mounted ventral-side up on double-sided sticky tape in a minimal volume of  
638 Voltalef oil (VWR), after dechoriation in bleach as per Evans et al., 2010 [90]. High-resolution live  
639 imaging of plasmatocytes was carried out on an UltraView Spinning Disk system (Perkin Elmer) using  
640 a40x UplanSApo oil immersion objective lens (NA 1.3). A Nikon A1 confocal microscope was used to  
641 image plasmatocyte morphology (40x CFI Super Plan Fluor ELWD oil immersion objective lens, NA  
642 0.6) and a Zeiss Airyscan microscope (40x Plan-Apochromat oil immersion objective lens, NA 1.4)  
643 was used for imaging of embryos stained with ROS dyes.

644

645 Wandering L3 Larvae were removed from straight-sided culture bottles containing the food on which  
646 they were reared at 25°C and cleaned in distilled water. Larvae were then imaged in fresh ice-cold,  
647 distilled water using a MZ205 FA fluorescent dissection microscope with a 2x PLANAPO objective

648 lens (Leica) and LasX software (Leica). White pre-pupae were collected from the same culture bottles  
649 and washed before imaging on the same system, which was also used to image subsequent stages of  
650 development. For analysis of plasmatocyte populations in pupae, white pre-pupae were also  
651 collected, aged at 25°C and the pupal case removed at a range of times after puparium formation.  
652 Dissected pupae were covered with halocarbon oil 500 (Sigma-Aldrich) to prevent desiccation during  
653 imaging. For imaging of plasmatocyte populations in adults, females were aged in vials containing  
654 cornmeal/agar/molasses media at 25°C, with no more than 7 flies kept per vial. Flies were  
655 transferred to new food vials every 2-3 days.

656

### 657 **Wounding assay**

658 Live stage 15 embryos were prepared and mounted as described above. The ventral epithelium of  
659 the embryos was ablated on the ventral midline using a Micropoint nitrogen-pulsed ablation laser  
660 (Andor) fitted to an Ultraview spinning disk confocal system (PerkinElmer) as per Evans et al.,  
661 2015 [91]. Pre-wound z-stacks of 30µm were taken of superficial plasmatocytes with a 1µm z-  
662 spacing between z-slices. Post-wound images were taken on the same settings either at 2-minute  
663 intervals for 60 minutes (Figure 1) or at the end timepoint of 60 minutes (Figures 6 and 7).

664

665 The proportion of plasmatocytes labelled with *UAS-stinger* (expression via *srp-GAL4* or *VT-GAL4*) was  
666 assessed by counting the number of labelled cells at or in contact with the wound site within a 35µm  
667 deep volume on the ventral midline at 60-minutes post-wounding; this was divided by the total  
668 number of labelled cells present within the stack to calculate the percentage of plasmatocytes  
669 responding to injury. The brightfield channel was used to visualise the wound margin and only those  
670 embryos with wounds between 1000µm<sup>2</sup> and 4000µm<sup>2</sup> were included in analyses. Quantification  
671 was performed on blinded images in Fiji.

672

### 673 **Quantification of migration speeds/random migration**

674 Embryos were prepared and mounted as described by Evans et al., 2010 [90]. Random migration was  
675 imaged using a spinning disk system (Ultraview, PerkinElmer), with an image taken every 2 minutes  
676 for 1 hour with a z-spacing of 1 $\mu$ m and approximately 20 $\mu$ m deep from the ventral nerve cord using  
677 a 20x UplanSApo air objective lens (NA 0.8). Maximum projections were made for each timepoint  
678 (25 $\mu$ m depth) and the centre of individual plasmatocyte cell bodies tracked using the manual  
679 tracking plugin in Fiji. Random migration speed ( $\mu$ m/min) and directionality (the ratio of the  
680 Cartesian distance to the actual distance migrated) were then calculated using the Ibidi chemotaxis  
681 plugin.

682

### 683 **Quantification of apoptotic cell clearance**

684 The number of vacuoles per plasmatocyte (averaged per embryo) was used as a read-out of  
685 apoptotic cell clearance as per Evans et al., 2013 [18]. Vacuoles were counted using z-stacks of GFP-  
686 labelled plasmatocytes taken from live imaging experiments. Vacuoles were scored in the z-slice in  
687 which each macrophage exhibited its maximal cross-sectional area. Only labelled plasmatocytes  
688 present on the ventral midline of stage 15 embryos were included. Analysis was performed on  
689 blinded image stacks. This analysis does not report the absolute numbers of apoptotic corpses per  
690 cell but provides a relative read-out of the phagocytic index.

691

### 692 **Fixation and immunostaining of embryos**

693 Embryos were fixed and stained as per Roddie et al., 2019 [52]. Embryos containing plasmatocytes  
694 labelled via *srp-GMA* and *GAL4*-driven tdTomato expression were fixed, then mounted in Dabco  
695 mountant. Control and *repo* mutant embryos containing plasmatocytes labelled via *crq-GAL4,UAS-*  
696 *GFP* were fixed and immunostained using mouse anti-GFP (ab1218 1:200; Abcam) and rabbit anti-  
697 cleaved DCP-1 (9578S 1:1000; Cell Signaling Technologies) to detect plasmatocytes and apoptotic  
698 cells, respectively. Embryos were imaged on the Nikon A1 system described above.

699

## 700 **Dissection, culture and stimulation of larval hemocytes**

701 Hemocytes were dissected from wandering L3 larvae by ripping open larvae from the posterior end  
702 in S2 cell media, which consists of Schneider's media (Sigma) supplemented with 10% heat-  
703 inactivated FBS (Gibco/Sigma) and 1X Pen/Strep (Gibco). 75µl of S2 media was used per larva with  
704 multiple larvae pooled per experiment. Cells in suspension were then transferred to glass-bottomed  
705 96-well plates (Corning) and allowed to adhere in a humidified box in the dark for 2 hours ahead of  
706 stimulation with heat-killed *S. cerevisiae* particles stained using calcofluor staining solution (Sigma).

707

708 *S. cerevisiae* (strain BY4741/accession number Y00000, Euroscarf consortium) were grown to  
709 exponential phase in YPD broth (Fisher) at 28°C. Yeast were heat killed at 60°C for 30 minutes, spun  
710 down and frozen at  $20 \times 10^9$  cells/ml.  $1 \times 10^9$  heat-killed yeast particles in 1ml of PBS (Fluka) were  
711 stained for 30 minutes at room temperature (with rotation) using 15µl of calcofluor staining  
712 solution. Stained yeast particles were washed in PBS and  $1 \times 10^6$  particles resuspended in 75µl S2 cell  
713 medium, which was then added to each well of larval hemocytes for 2 hours. Cells were fixed in  
714 wells using 4% EM-grade formaldehyde in PBS for 15 minutes and washed in PBS. Images were taken  
715 on a Nikon Ti-E inverted fluorescence microscope using a 20x objective lens and GFP and DAPI filter  
716 sets.

717

## 718 **Image analysis and statistical analysis**

719 All microscopy images were processed using Fiji [92]. Images were typically analysed as maximum z-  
720 projections, with the exception of analysis of numbers of cells labelled via *VT-GAL4* lines (Figure 2h),  
721 wound responses (Figure 6c-d), vacuolation (Figure 6k) and quantification of ROS staining  
722 (Supplementary Figure 3f). Quantification was performed on blinded z-stacks for these analyses.  
723 Statistical tests were performed using Prism 7 (GraphPad Software, La Jolla, California, USA). P

724 values less than 0.05 were deemed significant. A Student's t-test was performed when comparing  
725 two sets of parametric data. When multiple comparisons were required, a one-way ANOVA with  
726 Dunnett's multiple comparisons test was performed.

727

## 728 **Acknowledgements**

729 This work was funded by a Wellcome/Royal Society Sir Henry Dale Fellowship (102503/Z/13/Z)  
730 awarded to IRE and a Bateson Centre studentship awarded to IRE, MPZ and JAC. Imaging work was  
731 performed at the Wolfson Light Microscopy Facility, using the Perkin Elmer spinning disk (MRC grant  
732 G0700091 and Wellcome grant 077544/Z/05/Z), Nikon A1 confocal/TIRF (Wellcome  
733 grant WT093134AIA) and Zeiss AiryScan microscopes. This work would not be possible without  
734 reagents and resources obtained from or maintained by the Bloomington *Drosophila* Stock Centre  
735 (NIH P40OD018537), the Vienna *Drosophila* Research Centre and Flybase (NIH and MRC grants U41  
736 HG000739 and MR/N030117/1, respectively). We thank the *Drosophila* community for sharing  
737 *Drosophila* reagents (see Supplementary Table 1). We are grateful to Darren Robinson and the Fly  
738 Facility staff (University of Sheffield) for their support and to Phil Elks and Simon Johnston (University  
739 of Sheffield) for critical reading and feedback on the manuscript. We particularly thank Phil Elks and  
740 the now sadly departed Jarema Malicki for their advice and suggestions throughout the project. We  
741 thank Agata Grettka and Eleanor Castle for additional experiments that have contributed to our  
742 understanding of this project.

743

## 744 **Author contributions**

745 Experiments performed by JAC, AB, ELA and IRE. JAC, AB and IRE wrote the initial manuscript. All  
746 authors contributed to experimental design and revision of the manuscript. The project was  
747 conceived and funding obtained by IRE and MZ.

748

749 **Declaration of interests**

750 The authors declare no competing interests.

751

752 **References**

753

- 754 1. Wynn TA, Chawla A, Pollard JW. Macrophage biology in development, homeostasis and  
755 disease. *Nature*. 2013. doi:10.1038/nature12034
- 756 2. Gordon S, Plüddemann A. Tissue macrophages: heterogeneity and functions. *BMC Biol.*  
757 *BioMed Central*; 2017;15: 53. doi:10.1186/s12915-017-0392-4
- 758 3. Martinez FO, Gordon S. The M1 and M2 paradigm of macrophage activation: time for  
759 reassessment. *F1000Prime Rep*. 2014;6. doi:10.12703/P6-13
- 760 4. Murray PJ. Macrophage Polarization. *Annu Rev Physiol*. 2017; doi:10.1146/annurev-physiol-  
761 022516-034339
- 762 5. Nguyen-Chi M, Laplace-Builhe B, Travnickova J, Luz-Crawford P, Tejedor G, Phan QT, et al.  
763 Identification of polarized macrophage subsets in zebrafish. *Elife*. 2015;4: e07288.  
764 doi:10.7554/eLife.07288
- 765 6. Xu J, Wang T, Wu Y, Jin W, Wen Z. Microglia Colonization of Developing Zebrafish Midbrain Is  
766 Promoted by Apoptotic Neuron and Lysophosphatidylcholine. *Dev Cell*. 2016;38: 214–22.  
767 doi:10.1016/j.devcel.2016.06.018
- 768 7. Ferrero G, Mahony CB, Dupuis E, Yvernogeu L, Di Ruggiero E, Miserocchi M, et al. Embryonic  
769 Microglia Derive from Primitive Macrophages and Are Replaced by cmyb-Dependent  
770 Definitive Microglia in Zebrafish. *Cell Rep*. 2018; doi:10.1016/j.celrep.2018.05.066
- 771 8. Wiegertjes GF, Wentzel AS, Spaik HP, Elks PM, Fink IR. Polarization of immune responses in

- 772 fish: The ‘macrophages first’ point of view. *Mol Immunol*. 2016;  
773 doi:10.1016/j.molimm.2015.09.026
- 774 9. Buchmann K. Evolution of innate immunity: Clues from invertebrates via fish to mammals.  
775 *Front Immunol*. 2014; doi:10.3389/fimmu.2014.00459
- 776 10. Murray PJ, Wynn TA. Protective and pathogenic functions of macrophage subsets. *Nat Rev*  
777 *Immunol*. 2011;11: 723–737. doi:10.1038/nri3073
- 778 11. Murray PJ, Allen JE, Biswas SK, Fisher EA, Gilroy DW, Goerdts S, et al. Macrophage Activation  
779 and Polarization: Nomenclature and Experimental Guidelines. *Immunity*. 2014.  
780 doi:10.1016/j.immuni.2014.06.008
- 781 12. Colin S, Chinetti-Gbaguidi G, Staels B. Macrophage phenotypes in atherosclerosis. *Immunol*  
782 *Rev*. John Wiley & Sons, Ltd; 2014;262: 153–166. doi:10.1111/imr.12218
- 783 13. Vogel DYS, Glim JE, Stavenuiter AWD, Breur M, Heijnen P, Amor S, et al. Human macrophage  
784 polarization in vitro: Maturation and activation methods compared. *Immunobiology*.  
785 2014;219: 695–703. doi:10.1016/j.imbio.2014.05.002
- 786 14. Buchon N, Silverman N, Cherry S. Immunity in *Drosophila melanogaster* — from microbial  
787 recognition to whole-organism physiology. *Nat Rev Immunol*. 2014;14: 796–810.  
788 doi:10.1038/nri3763
- 789 15. Evans CJ, Hartenstein V, Banerjee U. Thicker than blood: conserved mechanisms in *Drosophila*  
790 and vertebrate hematopoiesis. *Dev Cell*. 2003;5: 673–90. Available:  
791 <http://www.ncbi.nlm.nih.gov/pubmed/14602069>
- 792 16. Wood W, Jacinto A. *Drosophila melanogaster* embryonic haemocytes: masters of  
793 multitasking. *Nat Rev Mol Cell Biol*. Nature Publishing Group; 2007;8: 542–551.  
794 doi:10.1038/nrm2202
- 795 17. Ratheesh A, Belyaeva V, Siekhaus DE. *Drosophila* immune cell migration and adhesion during  
796 embryonic development and larval immune responses. *Current Opinion in Cell Biology*. 2015.  
797 pp. 71–79. doi:10.1016/j.ceb.2015.07.003



- 798 18. Evans IR, Ghai PA, Urbančič V, Tan KL, Wood W. SCAR/WAVE-mediated processing of  
799 engulfed apoptotic corpses is essential for effective macrophage migration in *Drosophila*. *Cell*  
800 *Death Differ.* 2013;20: 709–720. doi:10.1038/cdd.2012.166
- 801 19. Stramer B, Wood W, Galko MJ, Redd MJ, Jacinto A, Parkhurst SM, et al. Live imaging of  
802 wound inflammation in *Drosophila* embryos reveals key roles for small GTPases during in vivo  
803 cell migration. *J Cell Biol.* 2005;168: 567–573. doi:10.1083/jcb.200405120
- 804 20. Paladi M, Tepass U. Function of Rho GTPases in embryonic blood cell migration in *Drosophila*.  
805 *J Cell Sci.* 2004;117: 6313–26. doi:10.1242/jcs.01552
- 806 21. Siekhaus D, Haesemeyer M, Moffitt O, Lehmann R. RhoL controls invasion and Rap1  
807 localization during immune cell transmigration in *Drosophila*. *Nat Cell Biol.* 2010;  
808 doi:10.1038/ncb2063
- 809 22. Comber K, Huelsmann S, Evans I, Sanchez-Sanchez BJ, Chalmers A, Reuter R, et al. A dual role  
810 for the PS integrin myospheroid in mediating *Drosophila* embryonic macrophage migration. *J*  
811 *Cell Sci.* 2013;126: 3475–3484. doi:10.1242/jcs.129700
- 812 23. Manaka J, Kuraishi T, Shiratsuchi A, Nakai Y, Higashida H, Henson P, et al. Draper-mediated  
813 and phosphatidylserine-independent phagocytosis of apoptotic cells by *Drosophila*  
814 hemocytes/macrophages. *J Biol Chem.* 2004;279: 48466–48476.  
815 doi:10.1074/jbc.M408597200
- 816 24. Franc NC, Dimarcq JL, Lagueux M, Hoffmann J, Ezekowitz RAB. Croquemort, a novel  
817 *drosophila* hemocyte/macrophage receptor that recognizes apoptotic cells. *Immunity.*  
818 1996;4: 431–443. doi:10.1016/S1074-7613(00)80410-0
- 819 25. Banerjee U, Girard JR, Goins LM, Spratford CM. *Drosophila* as a Genetic Model for  
820 Hematopoiesis. *Genetics.* 2019;211: 367–417. doi:10.1534/genetics.118.300223
- 821 26. Clark RI, Woodcock KJ, Geissmann F, Trouillet C, Dionne MS. Multiple TGF- $\beta$  superfamily  
822 signals modulate the adult *drosophila* immune response. *Curr Biol.* 2011;21: 1672–1677.  
823 doi:10.1016/j.cub.2011.08.048

- 824 27. Tattikota SG, Hu Y, Liu Y, Cho B, Barrera V, Steinbaugh M, et al. A single-cell survey of  
825 *Drosophila* blood. *bioRxiv*. Cold Spring Harbor Laboratory; 2019; 2019.12.20.884999.  
826 doi:10.1101/2019.12.20.884999
- 827 28. Cattenoz PB, Sakr R, Pavlidaki A, Delaporte C, Riba A, Molina N, et al. Temporal specificity and  
828 heterogeneity of *Drosophila* immune cells. *EMBO J*. 2020; e104486.  
829 doi:10.15252/emj.2020104486
- 830 29. Kvon EZ, Kazmar T, Stampfel G, Yáñez-Cuna JO, Pagani M, Schernhuber K, et al. Genome-scale  
831 functional characterization of *Drosophila* developmental enhancers in vivo. *Nature*. 2014;  
832 doi:10.1038/nature13395
- 833 30. Dutta D, Bloor JW, Ruiz-Gomez M, VijayRaghavan K, Kiehart DP. Real-time imaging of  
834 morphogenetic movements in *Drosophila* using Gal4-UAS-driven expression of GFP fused to  
835 the actin-binding domain of moesin. *genesis*. 2002;34: 146–151. doi:10.1002/gene.10113
- 836 31. Pfeiffer BD, Ngo T-TB, Hibbard KL, Murphy C, Jenett A, Truman JW, et al. Refinement of Tools  
837 for Targeted Gene Expression in *Drosophila*. *Genetics*. 2010;186: 735–755.  
838 doi:10.1534/genetics.110.119917
- 839 32. Lebestky T, Chang T, Hartenstein V, Banerjee U. Specification of *Drosophila* Hematopoietic  
840 Lineage by Conserved Transcription Factors. *Science* (80- ). 2000;288: 146–149.  
841 doi:10.1126/science.288.5463.146
- 842 33. Brodu R, Mugat B, Roignant J-Y, Lepesant J-A, Antoniewski C. Dual Requirement for the  
843 EcR/USP Nuclear Receptor and the dGATAb Factor in an Ecdysone Response in *Drosophila*  
844 *melanogaster* [Internet]. *MOLECULAR AND CELLULAR BIOLOGY*. 1999. Available:  
845 <http://mcb.asm.org/>
- 846 34. Das D, Ashoka D, Aradhya R, Inamdar M. Gene expression analysis in post-embryonic  
847 pericardial cells of *Drosophila*. *Gene Expr Patterns*. Elsevier; 2008;8: 199–205.  
848 doi:10.1016/J.GEP.2007.10.008
- 849 35. Charroux B, Royet J. Elimination of plasmatocytes by targeted apoptosis reveals their role in

- 850 multiple aspects of the *Drosophila* immune response. *Proc Natl Acad Sci U S A*. 2009;  
851 doi:10.1073/pnas.0903971106
- 852 36. Defaye A, Evans I, Crozatier M, Wood W, Lemaitre B, Leulier F. Genetic ablation of *Drosophila*  
853 phagocytes reveals their contribution to both development and resistance to bacterial  
854 infection. *J Innate Immun*. 2009;1: 322–334.
- 855 37. Regan JC, Brandão AS, Leitão AB, Mantas Dias ÂR, Sucena É, Jacinto A, et al. Steroid Hormone  
856 Signaling Is Essential to Regulate Innate Immune Cells and Fight Bacterial Infection in  
857 *Drosophila*. *PLoS Pathog*. 2013;9. doi:10.1371/journal.ppat.1003720
- 858 38. Dal-Secco D, Wang J, Zeng Z, Kolaczowska E, Wong CHY, Petri B, et al. A dynamic spectrum  
859 of monocytes arising from the in situ reprogramming of CCR2+ monocytes at a site of sterile  
860 injury. *J Exp Med*. The Rockefeller University Press; 2015;212: 447.  
861 doi:10.1084/JEM.20141539
- 862 39. Arnold L, Henry A, Poron F, Baba-Amer Y, van Rooijen N, Plonquet A, et al. Inflammatory  
863 monocytes recruited after skeletal muscle injury switch into antiinflammatory macrophages  
864 to support myogenesis. *J Exp Med*. The Rockefeller University Press; 2007;204: 1057–69.  
865 doi:10.1084/jem.20070075
- 866 40. Melcarne C, Lemaitre B, Kurant E. Phagocytosis in *Drosophila*: From molecules and cellular  
867 machinery to physiology. *Insect Biochem Mol Biol*. Pergamon; 2019;109: 1–12.  
868 doi:10.1016/j.ibmb.2019.04.002
- 869 41. McWhorter FY, Wang T, Nguyen P, Chung T, Liu WF. Modulation of macrophage phenotype  
870 by cell shape. *Proc Natl Acad Sci U S A*. 2013; doi:10.1073/pnas.1308887110
- 871 42. Ploeger DT, Hoesper NA, Schipper M, Koerts JA, de Rond S, Bank RA. Cell plasticity in wound  
872 healing: paracrine factors of M1/ M2 polarized macrophages influence the phenotypical state  
873 of dermal fibroblasts. *Cell Commun Signal*. 2013;11: 29. doi:10.1186/1478-811X-11-29
- 874 43. Rostam HM, Reynolds PM, Alexander MR, Gadegaard N, Ghaemmaghami AM. Image based  
875 Machine Learning for identification of macrophage subsets. *Sci Rep*. Nature Publishing Group;

- 876 2017;7: 3521. doi:10.1038/s41598-017-03780-z
- 877 44. Benoit M, Desnues B, Mege J-L. Macrophage Polarization in Bacterial Infections. *J Immunol.*  
878 2008;181: 3733–3739. doi:10.4049/jimmunol.181.6.3733
- 879 45. Lin W-H, Wright DE, Muraro NI, Baines RA. Alternative Splicing in the Voltage-Gated Sodium  
880 Channel  $\text{DmNa}_v$  Regulates Activation, Inactivation, and Persistent Current. *J Neurophysiol.*  
881 2009;102: 1994–2006. doi:10.1152/jn.00613.2009
- 882 46. Christodoulou S, Lockyer AE, Foster JM, Hoheisel JD, Roberts DB. Nucleotide sequence of a  
883 *Drosophila melanogaster* cDNA encoding a calnexin homologue. *Gene.* 1997;191: 143–8.  
884 doi:10.1016/s0378-1119(97)00025-5
- 885 47. Cuttell L, Vaughan A, Silva E, Escaron CJ, Lavine M, Van Goethem E, et al. Undertaker, a  
886 *Drosophila* Junctophilin, Links Draper-Mediated Phagocytosis and Calcium Homeostasis. *Cell.*  
887 2008;135: 524–534. doi:10.1016/j.cell.2008.08.033
- 888 48. Gronski MA, Kinchen JM, Juncadella IJ, Franc NC, Ravichandran KS. An essential role for  
889 calcium flux in phagocytes for apoptotic cell engulfment and the anti-inflammatory response.  
890 *Cell Death Differ.* 2009;16: 1323–31. doi:10.1038/cdd.2009.55
- 891 49. Weavers H, Evans IR, Martin P, Wood W. Corpse Engulfment Generates a Molecular Memory  
892 that Primes the Macrophage Inflammatory Response. *Cell.* 2016;165.  
893 doi:10.1016/j.cell.2016.04.049
- 894 50. A-Gonzalez N, Quintana JA, García-Silva S, Mazariegos M, González de la Aleja A, Nicolás-Ávila  
895 JA, et al. Phagocytosis imprints heterogeneity in tissue-resident macrophages. *J Exp Med.*  
896 2017;214: 1281–1296. doi:10.1084/jem.20161375
- 897 51. Fulco T de O, Andrade PR, Barbosa MG de M, Pinto TGT, Ferreira PF, Ferreira H, et al. Effect of  
898 apoptotic cell recognition on macrophage polarization and mycobacterial persistence. *Infect*  
899 *Immun.* 2014; doi:10.1128/IAI.02194-14
- 900 52. Roddie HG, Armitage EL, Coates JA, Johnston SA, Evans IR. Simu-dependent clearance of  
901 dying cells regulates macrophage function and inflammation resolution. *PLoS Biol.* 2019;

- 902           doi:10.1371/journal.pbio.2006741
- 903   53.   Armitage EL, Roddie HG, Evans IR. Overexposure to apoptosis via disrupted glial specification  
904           perturbs *Drosophila* macrophage function and reveals roles of the CNS during injury. *bioRxiv*.  
905           Cold Spring Harbor Laboratory; 2020; 2020.03.04.977546. doi:10.1101/2020.03.04.977546
- 906   54.   Campbell G, Göring H, Lin T, Spana E, Andersson S, Doe CQ, et al. RK2, a glial-specific  
907           homeodomain protein required for embryonic nerve cord condensation and viability in  
908           *Drosophila*. *Development*. 1994;120: 2957–66. Available:  
909           <http://www.ncbi.nlm.nih.gov/pubmed/7607085>
- 910   55.   Xiong WC, Okano H, Patel NH, Blendy JA, Montell C. repo encodes a glial-specific homeo  
911           domain protein required in the *Drosophila* nervous system. *Genes Dev*. 1994;  
912           doi:10.1101/gad.8.8.981
- 913   56.   Halter D a, Urban J, Rickert C, Ner SS, Ito K, Travers a a, et al. The homeobox gene repo is  
914           required for the differentiation and maintenance of glia function in the embryonic nervous  
915           system of *Drosophila melanogaster*. *Development*. 1995;121: 317–332.
- 916   57.   Shlyakhover E, Shklyar B, Hakim-Mishnaevski K, Levy-Adam F, Kurant E. *Drosophila* GATA  
917           factor serpent establishes phagocytic ability of embryonic macrophages. *Front Immunol*.  
918           2018; doi:10.3389/fimmu.2018.00266
- 919   58.   Braun A, Lemaitre B, Lanot R, Zachary D, Meister M. *Drosophila* immunity: analysis of larval  
920           hemocytes by P-element-mediated enhancer trap. *Genetics*. Genetics Society of America;  
921           1997;147: 623–34. Available: <http://www.ncbi.nlm.nih.gov/pubmed/9335599>
- 922   59.   Goto A, Kadowaki T, Kitagawa Y. *Drosophila* hemolectin gene is expressed in embryonic and  
923           larval hemocytes and its knock down causes bleeding defects. *Dev Biol*. Academic Press;  
924           2003;264: 582–591. doi:10.1016/J.YDBIO.2003.06.001
- 925   60.   Kurucz E, Vácz B, Márkus R, Laurinyecz B, Vilmos P, Zsámboki J, et al. Definition of *Drosophila*  
926           hemocyte subsets by cell-type specific antigens. *Acta Biol Hung*. 2007;58 Suppl: 95–111.  
927           doi:10.1556/ABiol.58.2007.Suppl.8

- 928 61. Kurucz É, Márkus R, Zsámboki J, Folkl-Medzihradzsky K, Darula Z, Vilmos P, et al. Nimrod, a  
929 Putative Phagocytosis Receptor with EGF Repeats in *Drosophila* Plasmatocytes. *Curr Biol. Cell*  
930 *Press*; 2007;17: 649–654. doi:10.1016/J.CUB.2007.02.041
- 931 62. Folwell JL, Barton CH, Shepherd D. Immunolocalisation of the *D. melanogaster* Nramp  
932 homologue Malvolio to gut and Malpighian tubules provides evidence that Malvolio and  
933 Nramp2 are orthologous. *J Exp Biol.* 2006;209: 1988–1995. doi:10.1242/jeb.02193
- 934 63. Moreira CGA, Regan JC, Zaidman-Rémy A, Jacinto A, Prag S. *Drosophila* Hemocyte Migration:  
935 An In Vivo Assay for Directional Cell Migration. *Methods in molecular biology* (Clifton, NJ).  
936 2011. pp. 249–260. doi:10.1007/978-1-61779-207-6\_17
- 937 64. Babcock DT, Brock AR, Fish GS, Wang Y, Perrin L, Krasnow M a, et al. Circulating blood cells  
938 function as a surveillance system for damaged tissue in *Drosophila* larvae. *Proc Natl Acad Sci*  
939 *U S A.* 2008;105: 10017–10022. doi:10.1073/pnas.0709951105
- 940 65. Mass E, Ballesteros I, Farlik M, Halbritter F, Günther P, Crozet L, et al. Specification of tissue-  
941 resident macrophages during organogenesis. *Science* (80- ). 2016;353: aaf4238–aaf4238.  
942 doi:10.1126/science.aaf4238
- 943 66. Gomez Perdiguero E, Klapproth K, Schulz C, Busch K, Azzoni E, Crozet L, et al. Tissue-resident  
944 macrophages originate from yolk-sac-derived erythro-myeloid progenitors. *Nature.* 2015;518:  
945 547–551. doi:10.1038/nature13989
- 946 67. Hoeffel G, Ginhoux F. Fetal monocytes and the origins of tissue-resident macrophages. *Cell*  
947 *Immunol.* 2018;330: 5–15. doi:10.1016/j.cellimm.2018.01.001
- 948 68. Sanchez Bosch P, Makhijani K, Herboso L, Gold KS, Baginsky R, Woodcock KJ, et al. Adult  
949 *Drosophila* Lack Hematopoiesis but Rely on a Blood Cell Reservoir at the Respiratory Epithelia  
950 to Relay Infection Signals to Surrounding Tissues. *Dev Cell.* 2019;51: 787-803.e5.  
951 doi:10.1016/j.devcel.2019.10.017
- 952 69. Cevik D, Acker M, Michalski C, Jacobs JR. Pericardin, a *Drosophila* collagen, facilitates  
953 accumulation of hemocytes at the heart. *Dev Biol.* 2019;454: 52–65.

- 954           doi:10.1016/j.ydbio.2019.06.006
- 955   70.   Van De Bor V, Zimniak G, Papone L, Cerezo D, Malbouyres M, Juan T, et al. Companion Blood  
956   Cells Control Ovarian Stem Cell Niche Microenvironment and Homeostasis. *Cell Rep.* 2015;13:  
957   546–560. doi:10.1016/j.celrep.2015.09.008
- 958   71.   Kiger JA, Natzle JE, Green MM. Hemocytes are essential for wing maturation in *Drosophila*  
959   melanogaster. *Proc Natl Acad Sci U S A.* 2001;98: 10190–5. doi:10.1073/pnas.181338998
- 960   72.   Ayyaz A, Li H, Jasper H. Haemocytes control stem cell activity in the *Drosophila* intestine. *Nat*  
961   Cell Biol. 2015;17: 736–748. doi:10.1038/ncb3174
- 962   73.   Zaidman-Rémy A, Regan JC, Brandão AS, Jacinto A. The *Drosophila* larva as a tool to study  
963   gut-associated macrophages: PI3K regulates a discrete hemocyte population at the  
964   proventriculus. *Dev Comp Immunol.* 2012;36: 638–47. doi:10.1016/j.dci.2011.10.013
- 965   74.   Krzyszczuk P, Schloss R, Palmer A, Berthiaume F. The role of macrophages in acute and  
966   chronic wound healing and interventions to promote pro-wound healing phenotypes.  
967   *Frontiers in Physiology.* 2018. doi:10.3389/fphys.2018.00419
- 968   75.   Zizzo G, Hilliard BA, Monestier M, Cohen PL. Efficient Clearance of Early Apoptotic Cells by  
969   Human Macrophages Requires M2c Polarization and MerTK Induction. *J Immunol.* 2012;189:  
970   3508–3520. doi:10.4049/jimmunol.1200662
- 971   76.   Lingnau M, Höflich C, Volk H-D, Sabat R, Döcke W-D. Interleukin-10 enhances the CD14-  
972   dependent phagocytosis of bacteria and apoptotic cells by human monocytes. *Hum Immunol.*  
973   2007;68: 730–738. doi:10.1016/j.humimm.2007.06.004
- 974   77.   Ogden CA, Pound JD, Batth BK, Owens S, Johannessen I, Wood K, et al. Enhanced Apoptotic  
975   Cell Clearance Capacity and B Cell Survival Factor Production by IL-10-Activated  
976   Macrophages: Implications for Burkitt’s Lymphoma. *J Immunol.* 2005;174: 3015–3023.  
977   doi:10.4049/jimmunol.174.5.3015
- 978   78.   Fadok VA, Bratton DL, Konowal A, Freed PW, Westcott JY, Henson PM. Macrophages that  
979   have ingested apoptotic cells in vitro inhibit proinflammatory cytokine production through

- 980 autocrine/paracrine mechanisms involving TGF-beta, PGE2, and PAF. *J Clin Invest.* 1998;101:  
981 890–898. doi:10.1172/JCI1112
- 982 79. Krejčová G, Danielová A, Nedbalová P, Kazek M, Strych L, Chawla G, et al. *Drosophila*  
983 macrophages switch to aerobic glycolysis to mount effective antibacterial defense. *Elife.*  
984 2019;8. doi:10.7554/eLife.50414
- 985 80. Van den Bossche J, O’Neill LA, Menon D. Macrophage Immunometabolism: Where Are We  
986 (Going)? *Trends in Immunology.* 2017. doi:10.1016/j.it.2017.03.001
- 987 81. Williams MJ. The *Drosophila* cell adhesion molecule Neuroglian regulates Lissencephaly-1  
988 localisation in circulating immunosurveillance cells. *BMC Immunol.* 2009;10: 17.  
989 doi:10.1186/1471-2172-10-17
- 990 82. Muller-Taubenberger A, Lupas AN, Li H, Ecke M, Simmeth E, Gerisch G. Calreticulin and  
991 calnexin in the endoplasmic reticulum are important for phagocytosis. *EMBO J.* 2001;20:  
992 6772–6782. doi:10.1093/emboj/20.23.6772
- 993 83. Brückner K, Kockel L, Duchek P, Luque CM, Rørth P, Perrimon N. The PDGF/VEGF receptor  
994 controls blood cell survival in *Drosophila*. *Dev Cell.* 2004;7: 73–84.  
995 doi:10.1016/j.devcel.2004.06.007
- 996 84. Wodarz A, Hinz U, Engelbert M, Knust E. Expression of crumbs confers apical character on  
997 plasma membrane domains of ectodermal epithelia of *drosophila*. *Cell.* 1995;82: 67–76.  
998 doi:10.1016/0092-8674(95)90053-5
- 999 85. Gyoergy A, Roblek M, Ratheesh A, Valoskova K, Belyaeva V, Wachner S, et al. Tools Allowing  
1000 Independent Visualization and Genetic Manipulation of *Drosophila melanogaster*  
1001 Macrophages and Surrounding Tissues. *G3&#58; Genes| Genomes| Genetics.* 2018;8:  
1002 g3.300452.2017. doi:10.1534/g3.117.300452
- 1003 86. Sinenko SA, Mathey-Prevot B. Increased expression of *Drosophila* tetraspanin, Tsp68C,  
1004 suppresses the abnormal proliferation of ytr-deficient and Ras/Raf-activated hemocytes.  
1005 *Oncogene.* Nature Publishing Group; 2004;23: 9120–9128. doi:10.1038/sj.onc.1208156



- 1006 87. Schott S, Ambrosini A, Barbaste A, Benassayag C, Gracia M, Proag A, et al. A fluorescent  
1007 toolkit for spatiotemporal tracking of apoptotic cells in living *Drosophila* tissues.  
1008 Development. 2017; dev.149807. doi:10.1242/dev.149807
- 1009 88. Halfon MS, Gisselbrecht S, Lu J, Estrada B, Keshishian H, Michelson AM. New fluorescent  
1010 protein reporters for use with the *Drosophila* Gal4 expression system and for vital detection  
1011 of balancer chromosomes. Genesis. 2002;34: 135–138. doi:10.1002/gene.10136
- 1012 89. Le T, Liang Z, Patel H, Yu MH, Sivasubramaniam G, Slovit M, et al. A New Family of *Drosophila*  
1013 Balancer Chromosomes With a w- dfd-GMR Yellow Fluorescent Protein Marker. Genetics.  
1014 2006;174: 2255–2257. doi:10.1534/genetics.106.063461
- 1015 90. Evans IR, Hu N, Skaer H, Wood W. Interdependence of macrophage migration and ventral  
1016 nerve cord development in *Drosophila* embryos. Development. 2010;137: 1625–1633.  
1017 doi:10.1242/dev.046797
- 1018 91. Evans IR, Rodrigues FSLM, Armitage EL, Wood W. Draper/CED-1 Mediates an Ancient Damage  
1019 Response to Control Inflammatory Blood Cell Migration In Vivo. Curr Biol. The Authors;  
1020 2015;25: 1606–12. doi:10.1016/j.cub.2015.04.037
- 1021 92. Schindelin J, Arganda-Carreras I, Frise E, Kaynig V, Longair M, Pietzsch T, et al. Fiji: an open-  
1022 source platform for biological-image analysis. Nat Methods. Nature Publishing Group; 2012;9:  
1023 676–682. doi:10.1038/nmeth.2019
- 1024

**Figure 1**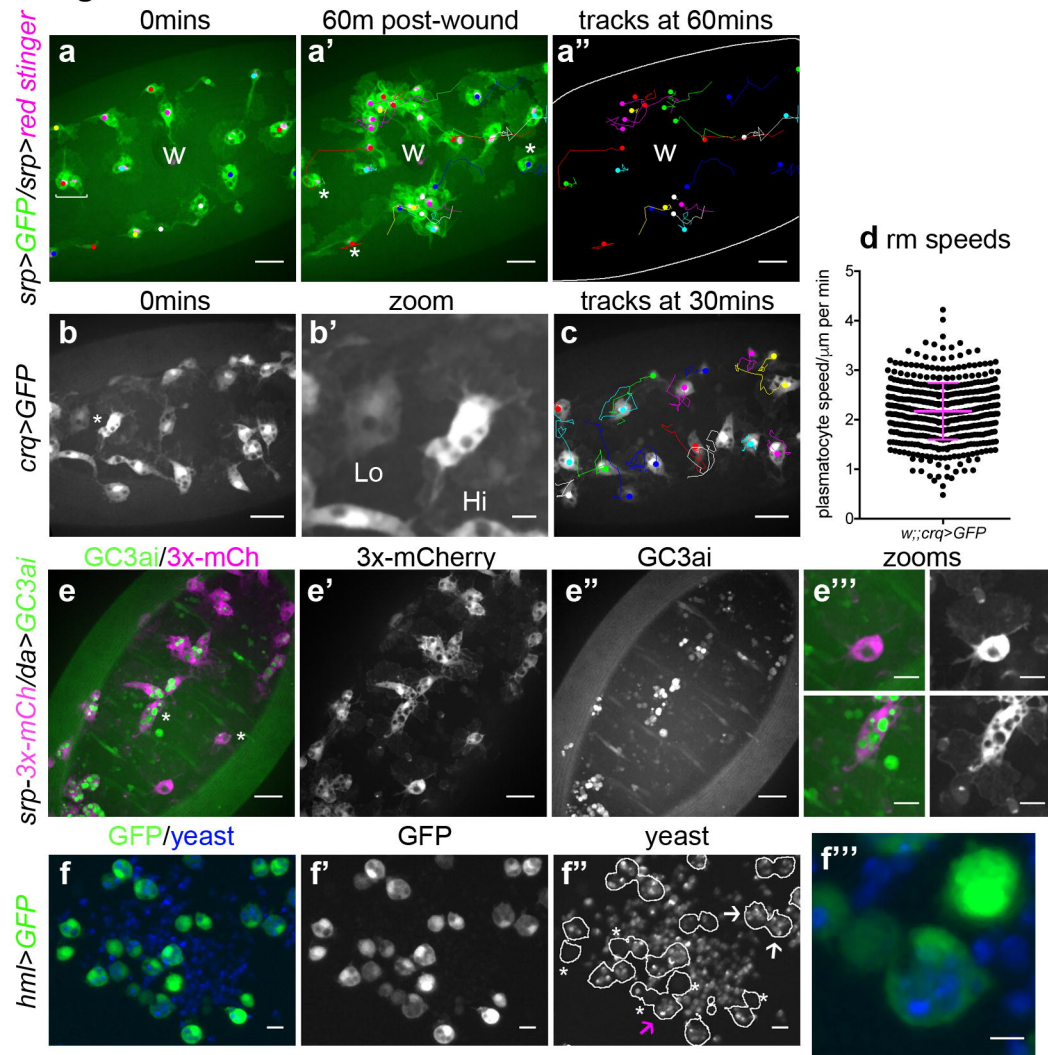

**Figure 2**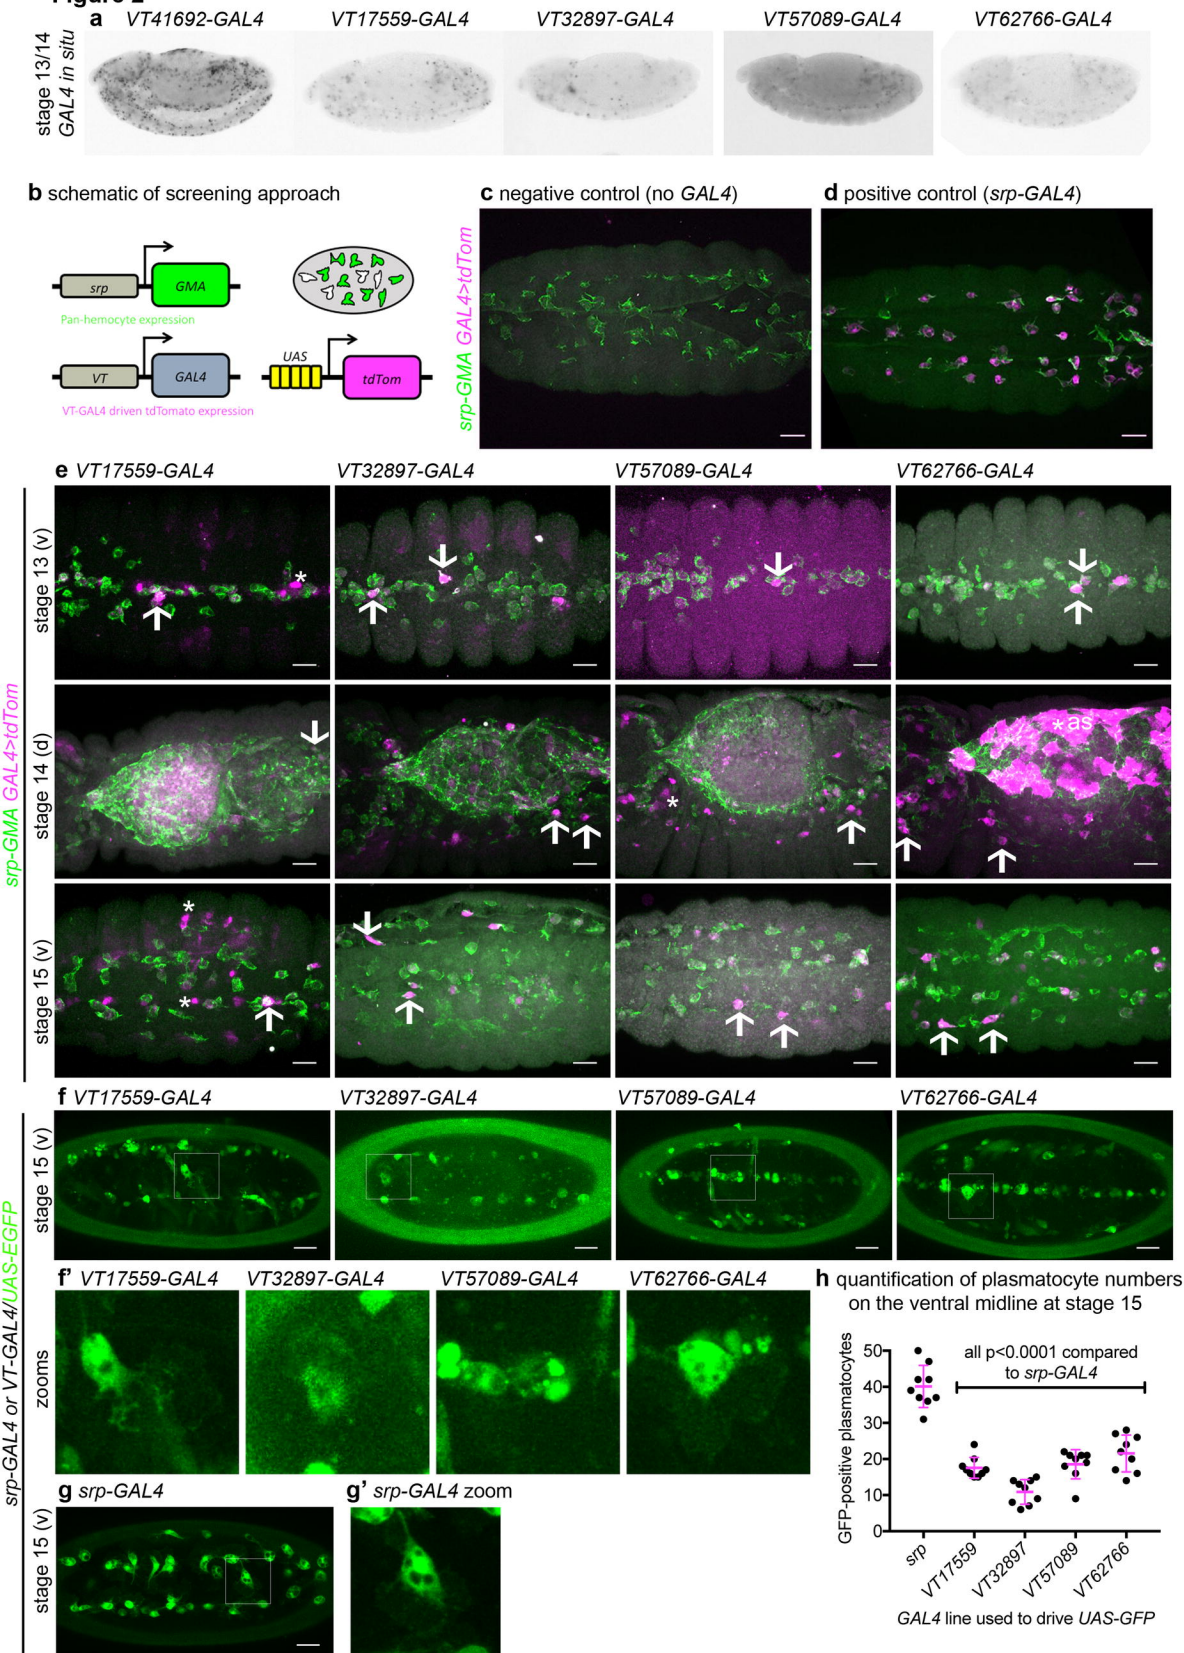

**Figure 3**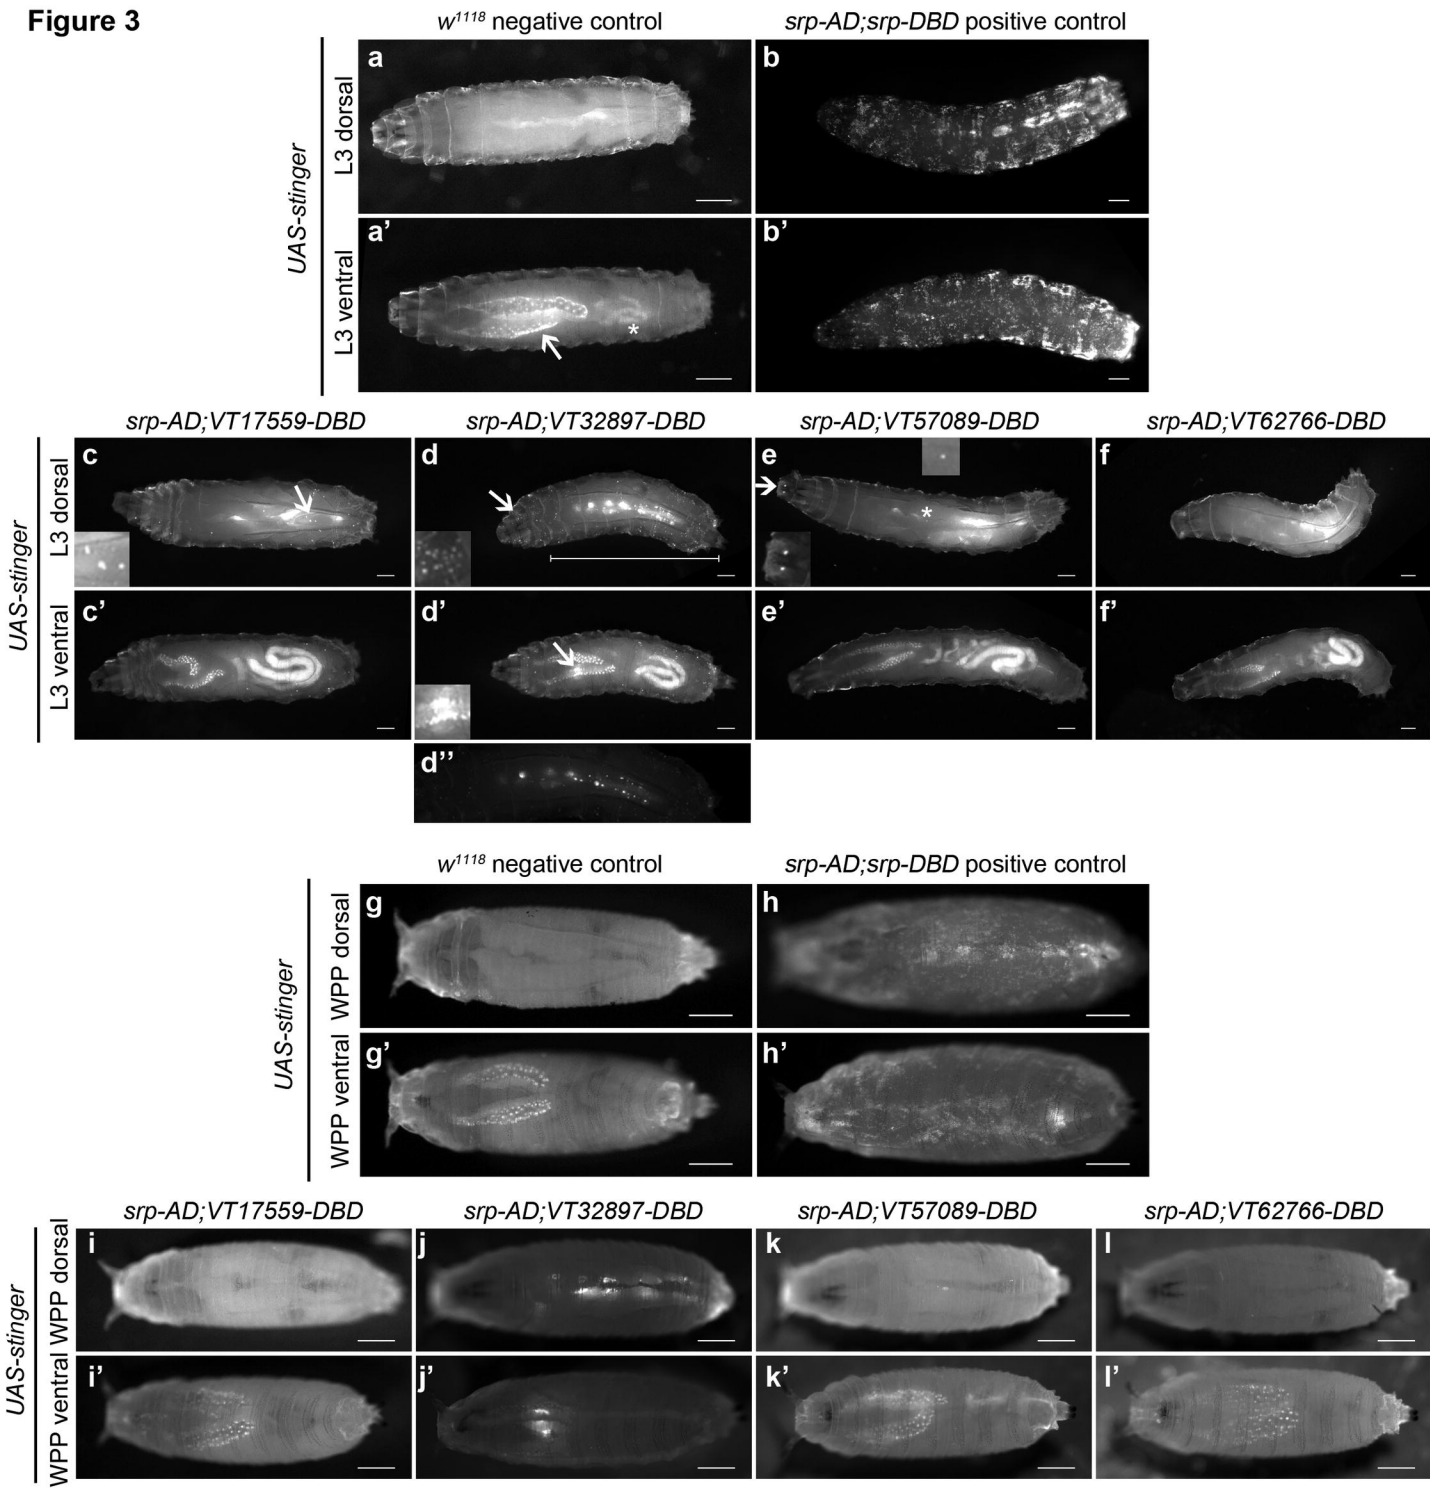

**Figure 4**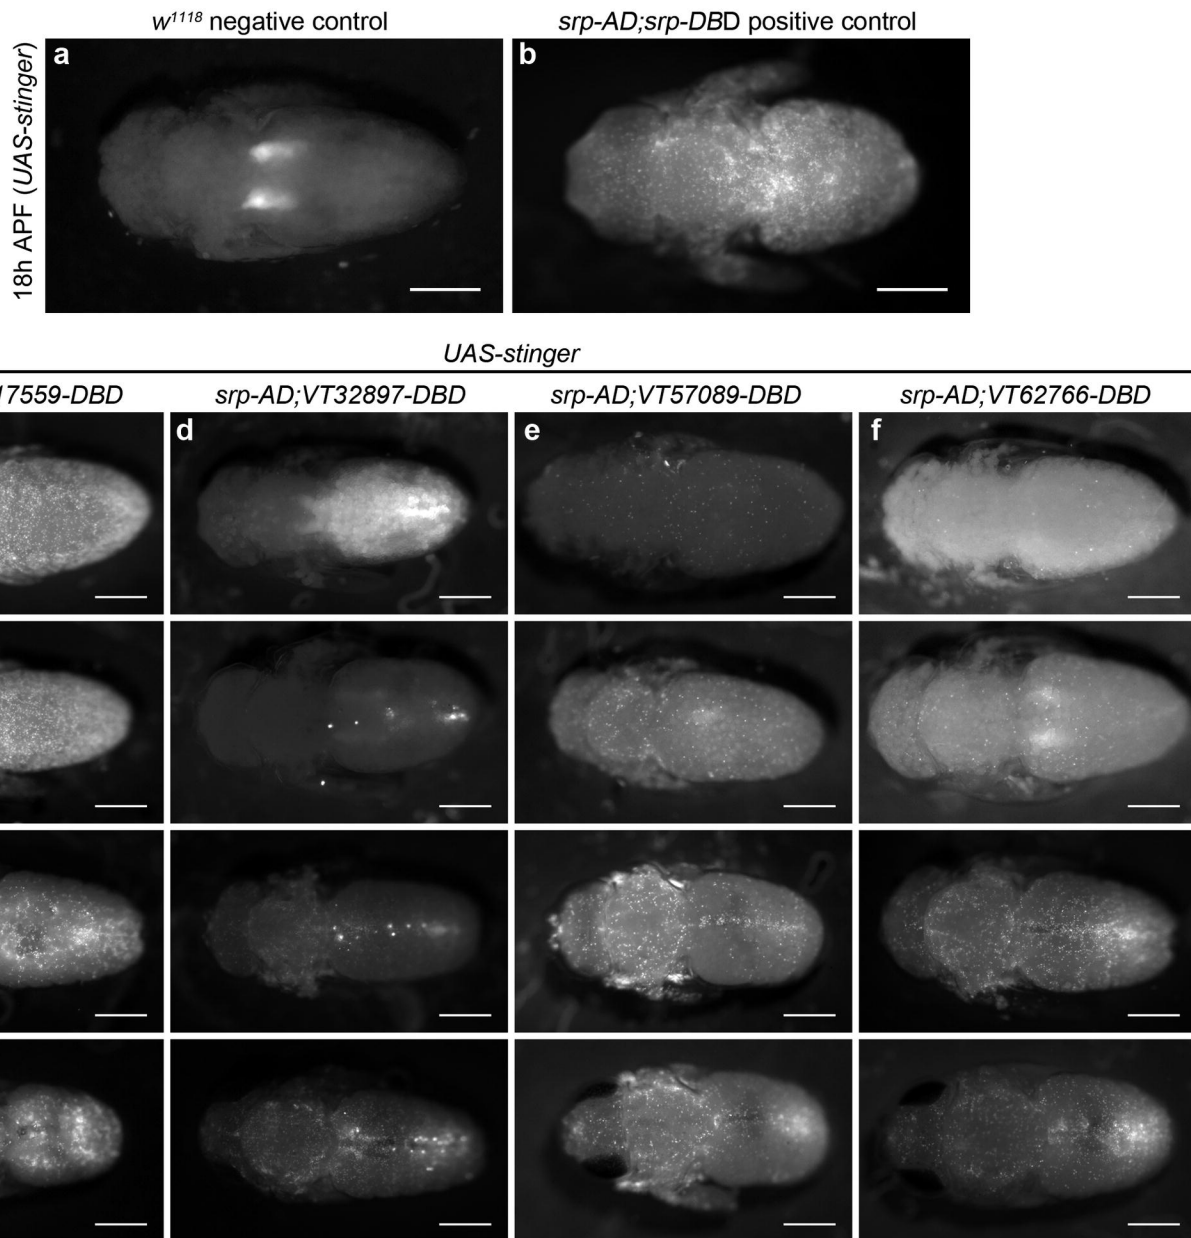

**Figure 5***UAS-stinger*+ve con *srp-3x-mCherry**srp-AD;VT17559-DBD**srp-AD;VT32897-DBD**srp-AD;VT57089-DBD**srp-AD;VT62766-DBD*

day 1 post-eclosion

1 week

2 weeks

4 weeks

6 weeks

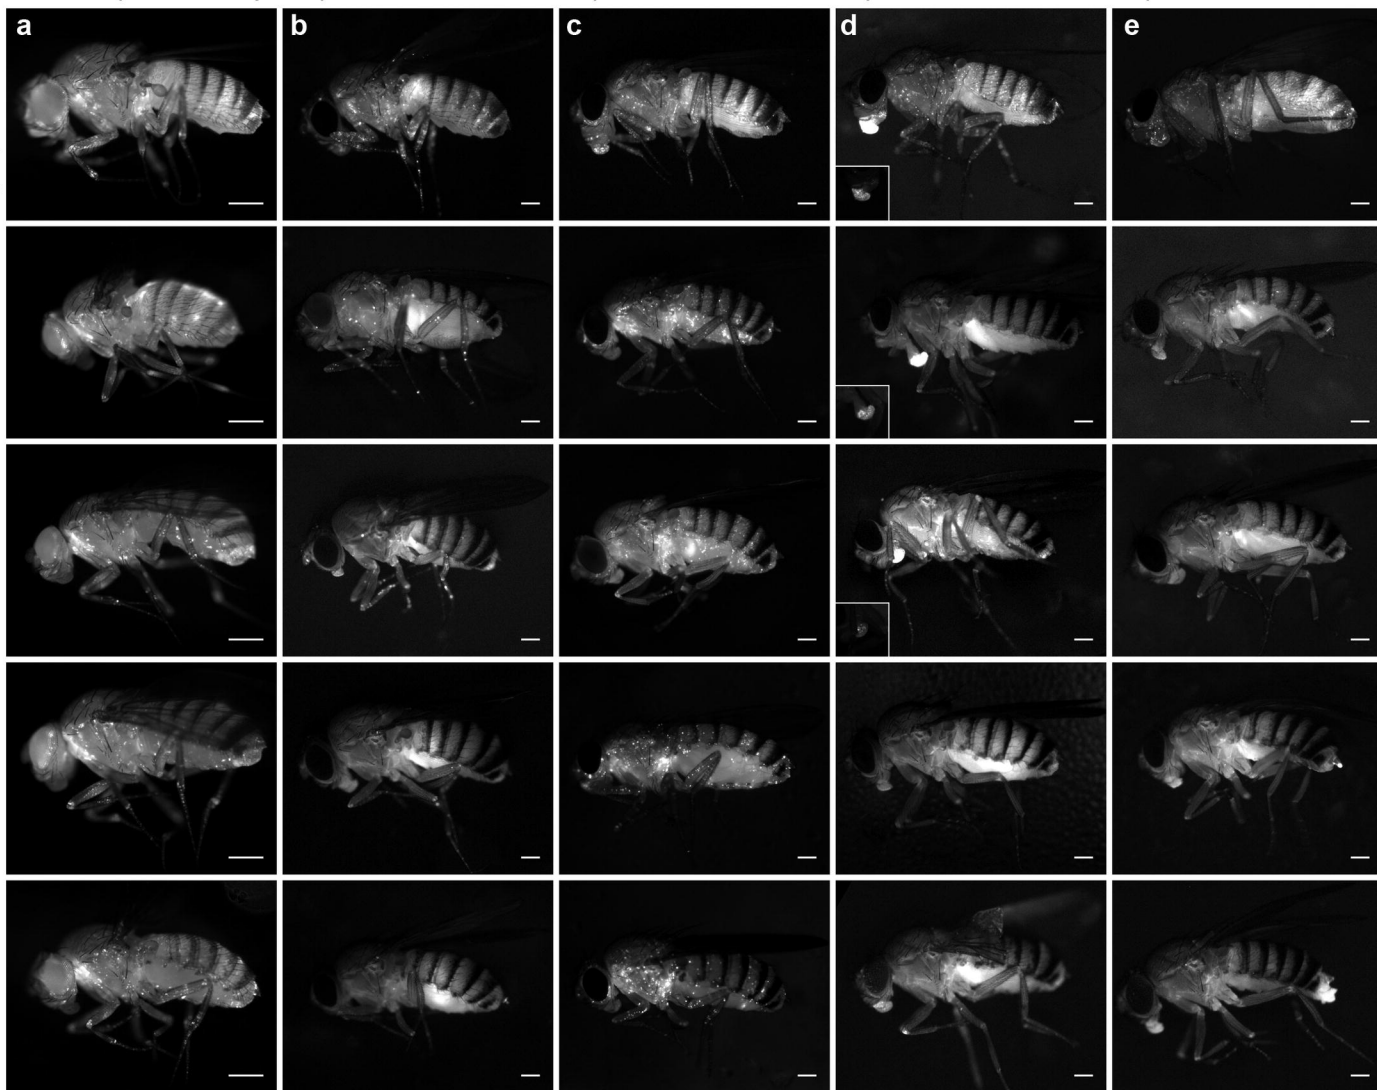

## Figure 6

*UAS-stinger*, 60 min  
plasmatocyte wound response

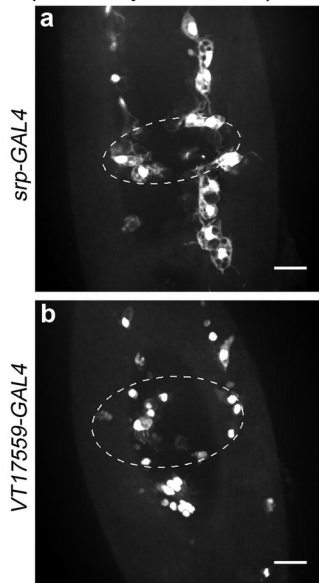

**c** proportion of VT-GAL4 labelled plasmatocytes responding to wounds

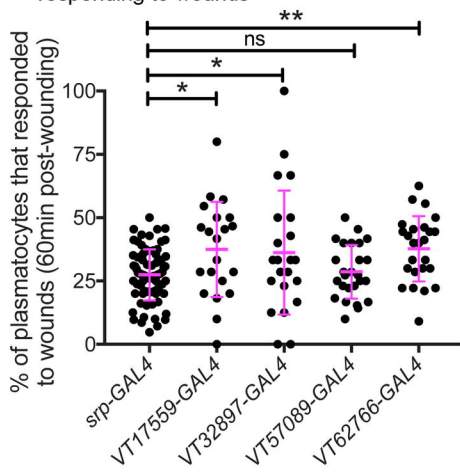

**d** numbers of VT-GAL4 labelled plasmatocytes at st15 (in region wounded)

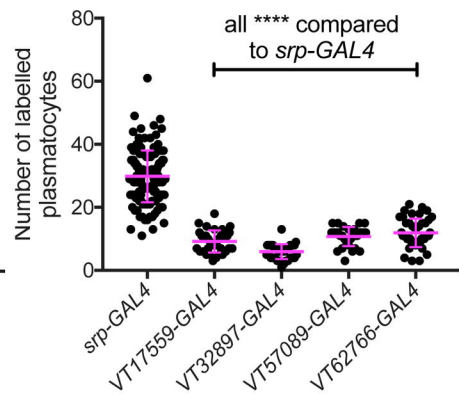

*UAS-stinger*, plasmatocyte tracks for 60 mins from st15

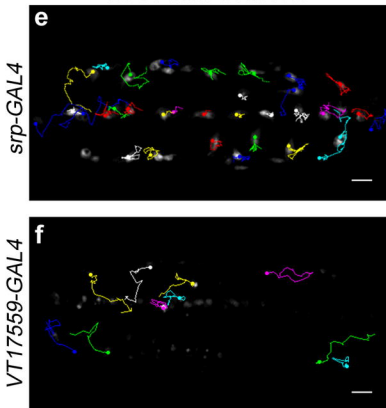

**g** speed of VT-GAL4 labelled plasmatocytes

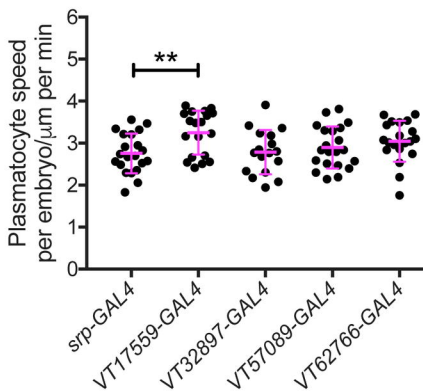

**h** directionality of VT-GAL4 labelled plasmatocytes

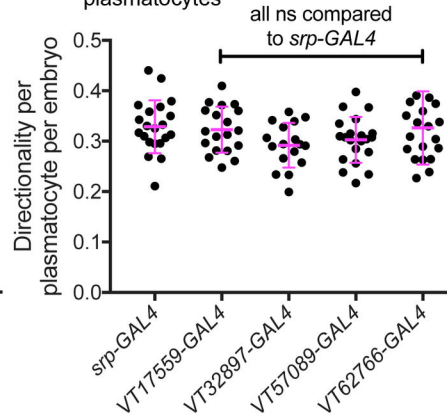

*UAS-stinger*, ventral midline

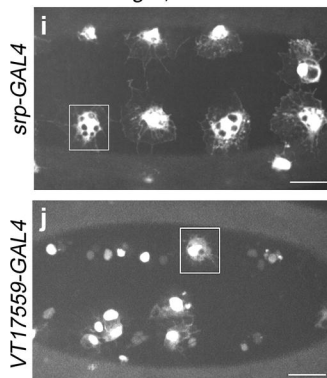

zoom

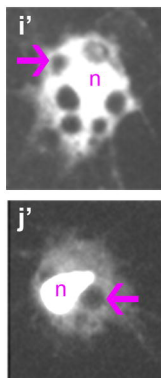

**k** efferocytosis by VT-GAL4 labelled plasmatocytes

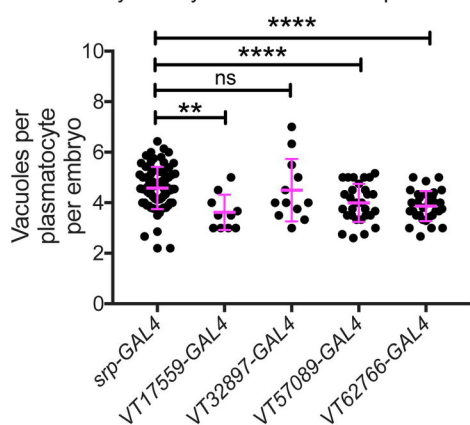

# Figure 7

## a genomic location of VT62766 enhancer region (X Chromosome)

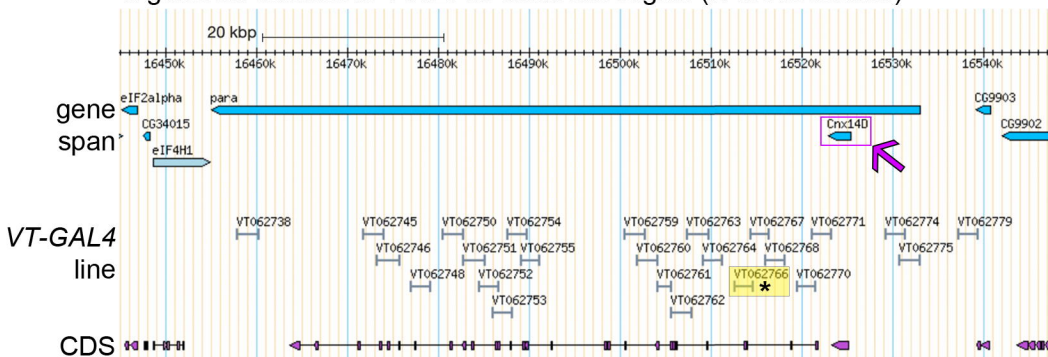

## b plasmatocytes on midline at stage 15

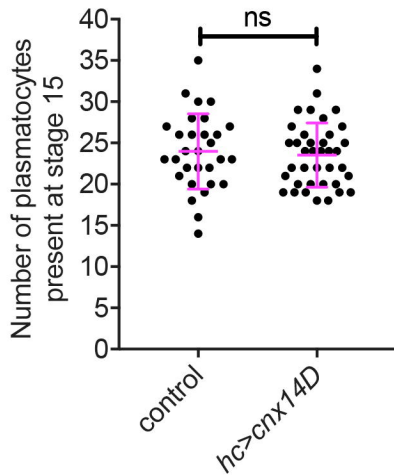

## c wound responses

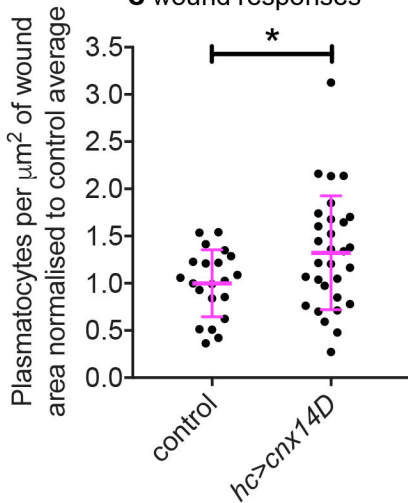



**Figure 8**

cDCP-1 (apoptotic cells)

plasmatocytes (GFP)

merge

control stage 15

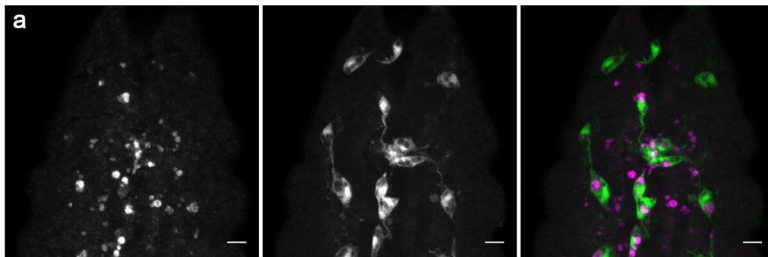

repo mutant stage 15

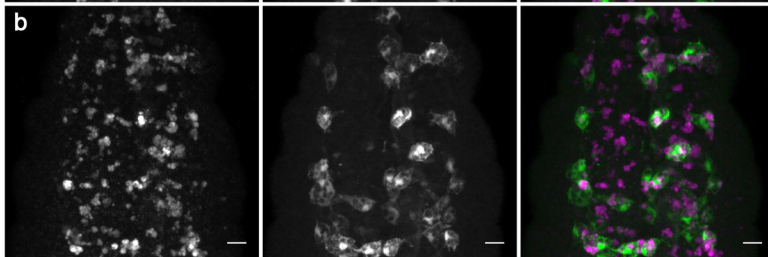negative control (no VT-GAL4)  
*srp-H2A-3x-mCherry* alone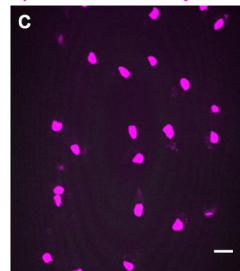

VT17559-GAL4 control

VT32897-GAL4 control

VT57089-GAL4 control

VT62766-GAL4 control

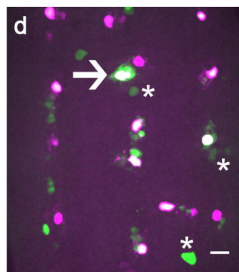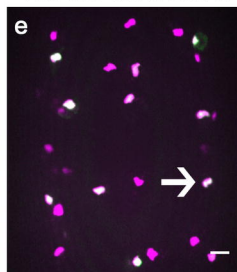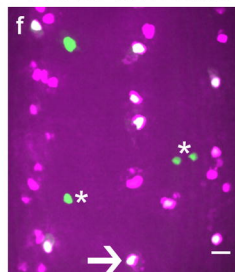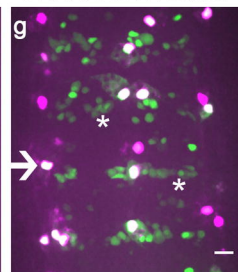

VT17559-GAL4,repo

VT32897-GAL4,repo

VT57089-GAL4,repo

VT62766-GAL4,repo

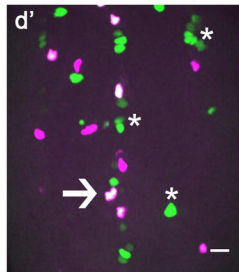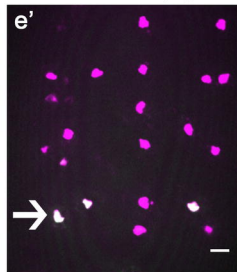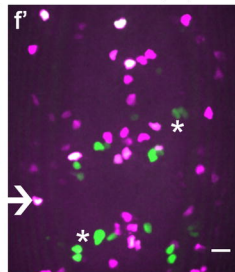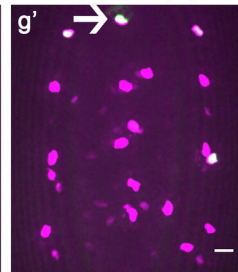VT-GAL4\_UAS-stinger + *srp-H2A-3x-mCherry***h** proportion of plasmatocytes labelled via VT-GAL4 transgenes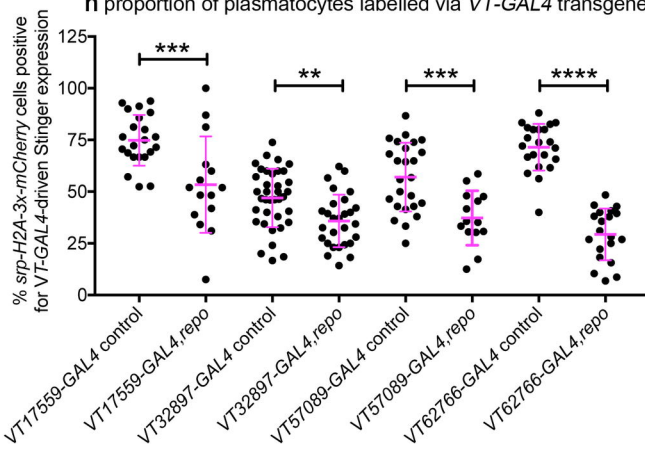

**Table 1. Summary of plasmatocyte subpopulation characteristics and their developmental regulation**

| Subpopulation  | Subpopulation characteristics (compared to overall population): |                 |               |               |                                | Subpopulations in:                    |                                                      |                                     |                       |                           |
|----------------|-----------------------------------------------------------------|-----------------|---------------|---------------|--------------------------------|---------------------------------------|------------------------------------------------------|-------------------------------------|-----------------------|---------------------------|
|                | Wound responses                                                 | Migration speed | Efferocytosis | ROS levels    | Phagocytosis of <i>E. coli</i> | Embryos                               | Larvae                                               | Pupae                               | Newly hatched adults  | Aged adults               |
| <b>VT17559</b> | ↑                                                               | ↑               | ↓             | no difference | no difference                  | distinct subpopulation                | very few cells labelled                              | large numbers labelled by 18h APF   | large numbers present | largely absent by 2 weeks |
| <b>VT32897</b> | ↑                                                               | no difference   | no difference | no difference | no difference                  | distinct subpopulation (fewest cells) | few cells labelled + nephrocytes & garland cells (?) | large numbers labelled by 72h APF   | large numbers present | labelled cells persist    |
| <b>VT57089</b> | no difference                                                   | no difference   | ↓             | no difference | no difference                  | distinct subpopulation                | almost no cells labelled + Bolwig Organ (?)          | steady increase in numbers labelled | large numbers present | largely absent by 1 week  |
| <b>VT62766</b> | ↑                                                               | no difference   | ↓             | no difference | no difference                  | distinct subpopulation                | almost no cells labelled                             | large numbers labelled by 48h APF   | large numbers present | largely absent by 1 week  |

**Table 2. VT enhancer region location and neighbouring genes**

| <b>VT enhancer</b> | <b>Genomic region*</b>  | <b>Nearest genes</b>                           | <b>Distance of enhancer from gene</b>                   |
|--------------------|-------------------------|------------------------------------------------|---------------------------------------------------------|
| <i>VT17559</i>     | chr2R 12069698–12070780 | <i>Lis-1</i><br><i>CG8441</i><br><i>Ptp52F</i> | overlapping<br>2929bp upstream<br>3887bp downstream     |
| <i>VT32897</i>     | chr3L 18631149–18633281 | <i>MYPT-75D</i><br><i>bora</i><br><i>not</i>   | overlapping<br>13299bp downstream<br>15921bp downstream |
| <i>VT57089</i>     | chrX 4961770–4962316    | <i>ovo</i><br><i>CG32767</i><br><i>CR44833</i> | overlapping<br>3290bp upstream<br>3870bp downstream     |
| <i>VT62766</i>     | chrX 16406666–16408777  | <i>para</i><br><i>cnx14D</i><br><i>CG9903</i>  | overlapping<br>10404bp upstream<br>26520bp upstream     |

\* *D. melanogaster* Apr. 2006 (BDGP R5/dm3) Assembly

Data taken from <http://enhancers.starklab.org/>
